# 1    **The Genetic Architecture of Biological Age in Nine Human Organ** 2    **Systems**

3    Junhao Wen<sup>1\*</sup>, Ye Ella Tian<sup>2</sup>, Ioanna Skampardoni<sup>3</sup>, Zhijian Yang<sup>3</sup>, Yuhan Cui<sup>3</sup>, Filippos  
4    Anagnostakis<sup>4</sup>, Elizabeth Mamourian<sup>3</sup>, Bingxin Zhao<sup>5</sup>, Arthur W. Toga<sup>6</sup>, Andrew Zalesky<sup>2</sup>,  
5    Christos Davatzikos<sup>3</sup>

6  
7    <sup>1</sup>Laboratory of AI and Biomedical Science (LABS), Stevens Neuroimaging and Informatics Institute, Keck School  
8    of Medicine of USC, University of Southern California, Los Angeles, California, USA

9    <sup>2</sup>Melbourne Neuropsychiatry Centre, Department of Psychiatry, Melbourne Medical School, The University of  
10    Melbourne, Melbourne, Victoria, Australia

11    <sup>3</sup>Artificial Intelligence in Biomedical Imaging Laboratory (AIBIL), Center for AI and Data Science for Integrated  
12    Diagnostics (AI<sup>2</sup>D), Perelman School of Medicine, University of Pennsylvania, Philadelphia, USA

13    <sup>4</sup>Department of Medical and Surgical Sciences, University of Bologna, 40126 Bologna, Italy

14    <sup>5</sup>Department of Statistics and Data Science, University of Pennsylvania, Philadelphia, PA, USA

15    <sup>6</sup>Laboratory of Neuro Imaging (LONI), Stevens Neuroimaging and Informatics Institute, Keck School of Medicine  
16    of USC, University of Southern California, Los Angeles, California, USA

17  
18  
19    \*Corresponding author:

20    Junhao Wen, [junhaowe@usc.edu](mailto:junhaowe@usc.edu)

21    2025 Zonal Ave, Los Angeles, CA 90033, United States

22  
23    Word counts: 5701 words

## 24 **Abstract**

25 Understanding the genetic basis of biological aging in multi-organ systems is vital for  
26 elucidating age-related disease mechanisms and identifying therapeutic interventions. This study  
27 characterized the genetic architecture of the biological age gap (BAG) across nine human organ  
28 systems in 377,028 individuals of European ancestry from the UK Biobank. We discovered 393  
29 genomic loci-BAG pairs ( $P\text{-value} < 5 \times 10^{-8}$ ) linked to the brain, eye, cardiovascular, hepatic,  
30 immune, metabolic, musculoskeletal, pulmonary, and renal systems. We observed BAG-organ  
31 specificity and inter-organ connections. Genetic variants associated with the nine BAGs are  
32 predominantly specific to the respective organ system while exerting pleiotropic effects on traits  
33 linked to multiple organ systems. A gene-drug-disease network confirmed the involvement of the  
34 metabolic BAG-associated genes in drugs targeting various metabolic disorders. Genetic  
35 correlation analyses supported Cheverud's Conjecture<sup>1</sup> – the genetic correlation between BAGs  
36 mirrors their phenotypic correlation. A causal network revealed potential causal effects linking  
37 chronic diseases (e.g., Alzheimer's disease), body weight, and sleep duration to the BAG of  
38 multiple organ systems. Our findings shed light on promising therapeutic interventions to  
39 enhance human organ health within a complex multi-organ network, including lifestyle  
40 modifications and potential drug repositioning strategies for treating chronic diseases. All results  
41 are publicly available at <https://labs-laboratory.com/medicine>.

## 42 Main

43 Biological aging is complex and influenced by many factors, including genetics<sup>2</sup>, environmental  
44 exposures<sup>3</sup>, and modifiable lifestyle factors<sup>4</sup> across multiple organ systems. A comprehensive  
45 understanding of the phenotypic landscape and genetic architecture underlying biological aging  
46 in multiple human organ systems is paramount in forging the path toward precision medicine<sup>5</sup>,  
47 including identifying vulnerability (e.g., smoking) and resilience factors (e.g., physical  
48 activities). This knowledge can improve our understanding of the underlying mechanisms  
49 driving age-related diseases, identify novel therapeutic targets, and develop personalized  
50 interventions for maintaining health and functional independence in the aging population.

51 Previous research efforts have made progress in studying the interconnectedness of multi-  
52 organ systems in human health<sup>3,6-13</sup>. In a recent study by McCracken et al., a heart-brain-liver  
53 axis was studied, highlighting direct and indirect associations among the three organs and their  
54 interconnectivity and shared biological pathways<sup>11</sup>. A recent review highlighted the role of inter-  
55 organ signals in metabolic control, including the secretion of peptides, small molecules, and lipid  
56 mediators by metabolic tissues and the involvement of the central nervous system in  
57 coordinating peripheral metabolic functions<sup>9</sup>. Riding the crest of the wave of artificial  
58 intelligence (AI), the biomedical community has increasingly adopted the biological age gap  
59 (BAG) as a comprehensive biomarker of human aging in multiple human organ systems.  
60 Specifically, BAG serves as a quantitative phenotype to capture the disparity between an  
61 individual's AI-derived age and chronological age, which can be used to model aging-related  
62 normative trajectory at the individual level and holds potential for application in disease  
63 populations to capture pertinent pathological processes. For instance, Nie et al. derived the  
64 biological age in nine organ systems to predict the possibility of becoming centenarian<sup>13</sup>. In our  
65 previous study, Tian et al. derived eight BAGs in eight organ systems, correlating them with  
66 cognition, chronic disease, lifestyle factors, and mortality<sup>3</sup>. We employed a support vector  
67 machine in cross-validation to predict BAGs for multiple organ systems (**Method 1** for details).

68 However, genetic determinants and biological pathways that underlie the observed  
69 heterogeneity of organ-specific BAGs remain elusive. Furthermore, whether chronic diseases  
70 and lifestyle factors causally impact the divergence between predicted age and chronological age  
71 in these organ systems remains to be established, manifesting as either a younger or older  
72 biological age. Our previous genome-wide association study (GWAS) uncovered the genetic  
73 heterogeneity of the multimodal brain BAGs using magnetic resonance imaging (MRI) data<sup>14</sup>.  
74 Expanding on prior research, the current study sought to comprehensively depict the genetic  
75 architecture underlying biological aging across nine human organ systems, including the brain,  
76 cardiovascular, eye, hepatic, immune, metabolic, musculoskeletal, pulmonary, and renal BAGs.  
77 Our overarching hypothesis postulates that the genetic determinants associated with the nine  
78 BAGs are not only specific to individual organ systems (i.e., BAG-organ specificity) but also  
79 directly or indirectly interconnected with other organ systems (i.e., inter-organ connection).

80 In the current study, we analyzed multimodal data from 377,028 individuals of European  
81 ancestry in the UK Biobank study<sup>15</sup> (UKBB) to comprehensively capture the genetic architecture  
82 of the nine organ systems (**Method 2**). First, we used data from 154,774 participants to perform  
83 GWAS, gene-level, partitioned heritability, and genetic correlation analyses (**Method 3**). In our  
84 Mendelian randomization analyses, we used 222,254 UKBB participants that did not overlap  
85 with the individuals used to compute BAG to avoid potential bias<sup>16</sup>. We *i*) identified both  
86 previously reported and newly identified genomic loci, *ii*) demonstrated a greater genetic  
87 heritability estimate for the brain BAG compared to other organ systems, *iii*) constructed a

88 network linking genes, drugs, and diseases for potential drug repurposing, *iv*) confirmed that  
89 BAG-associated variants and genes exhibit BAG-organ specificity and inter-organ connection,  
90 and *v*) established both genetic correlations and causal networks among the nine BAGs, chronic  
91 diseases, and lifestyle factors. All results, including the GWAS summary statistics, are publicly  
92 accessible through the MEDICINE (Multi-organ biomEDical sCIeNcE) knowledge portal:  
93 <https://labs-laboratory.com/medicine>.

94

## 95 Results

### 96 Genome-wide associations identify 393 genomic loci associated with the nine biological age 97 gaps

98 In the European populations, GWAS (Method 3a) identified 11, 44, 17, 41, 61, 76, 24, 67, and  
99 52 genomic loci ( $P\text{-value} < 5 \times 10^{-8}$ ) significantly associated with the brain, cardiovascular, eye,  
100 hepatic, immune, metabolic, musculoskeletal, pulmonary, and renal BAGs, respectively (Fig. 1).  
101 All details of the identified loci are presented in Supplementary eFile 1. Manhattan and QQ  
102 plots are presented in Supplementary eFigures 1-9 and available in the MEDICINE knowledge  
103 portal (<https://labs-laboratory.com/medicine>).

104 We estimated the intercept of linkage disequilibrium score regression (LDSC)<sup>17</sup> for the  
105 nine main GWAS and obtained intercepts of  $0.9989 \pm 0.009$ ,  $1.0185 \pm 0.0099$ ,  $0.9926 \pm 0.0106$ ,  
106  $1.0416 \pm 0.0113$ ,  $1.0293 \pm 0.0107$ ,  $1.0308 \pm 0.0124$ ,  $1.0282 \pm 0.0099$ ,  $1.0442 \pm 0.0104$ , and  
107  $1.0257 \pm 0.0112$  for the nine BAGs. All the intercepts were close to 1, indicating no substantial  
108 genomic inflation in the primary GWAS. Furthermore, we conducted four sensitivity analyses  
109 (Method 3a) to assess the robustness of the primary nine GWASs on individuals of European  
110 ancestry (Supplementary eText 1). Our GWASs demonstrated robustness in split-sample  
111 GWAS, with a perfect concordance rate for the sign (+/-) of  $\beta$  values ( $C\text{-}\beta=1$ ) between the split1  
112 and split2 GWASs. The two sets of  $\beta$  values were highly correlated ( $0.90 < r\text{-}\beta < 0.99$  for Pearson's  
113  $r$ ) and did not significantly differ ( $P\text{-}\beta > 0.48$  for two-sample t-test). We compared the GWAS  
114 results with linear models in PLINK and linear mixed-effect models in fastGWA<sup>18</sup>, resulting in a  
115 perfect concordance for the two sets of  $\beta$  values, as well as very similar LDSC intercept values.  
116 These findings further support the absence of cryptic population stratification in our primary  
117 GWASs. Sex-stratified GWASs unveiled distinctive genetic patterns specific to each sex, with  
118 noteworthy disparities observed in the genetic architecture of the immune BAG ( $r\text{-}\beta=0.29$ ;  $P\text{-}\beta=0.01$ ;  $C\text{-}\beta=0.55$ ). Immune responses exhibit sex differences that vary across the lifespan and  
119 are influenced by age and reproductive status<sup>19</sup>. Detailed quantitative information regarding these  
120 observations can be found in Supplementary eText 1, while visual representations of these  
121 patterns are available in Supplementary eFigures 5 and 7. Finally, the genetic signals identified  
122 within non-European populations were less prominent compared to the European GWAS due to  
123 the limited sample size, but we found a high concordance between the two sets of  $\beta$  values using  
124 the three proposed metrics ( $0.85 < r\text{-}\beta < 0.95$ ;  $0.89 < C\text{-}\beta < 1$ ;  $P\text{-}\beta > 0.12$ ). This underscores the  
125 necessity of expanding sample sizes within underrepresented ethnic groups in future GWAS  
126 studies. Detailed statistics can be found in Supplementary eFiles 2-5.

127  
128 Certain genomic loci exhibited unique associations with individual organs, whereas  
129 others displayed connections to multiple organ BAGs in close genomic proximity based on their  
130 cytogenetic position. For instance, the locus on chromosome 6 associated with the hepatic  
131 (rs62401887, position: 24416482 at 6p22.3), immune (rs80215559, position: 25918225 at

132 6p22.3), metabolic (rs79220007, position: 26098474 at 6p22.2), musculoskeletal (rs2744575,  
133 position: 24494975 at 6p22.3), pulmonary (rs411535, position: 22061040 at 6p22.3), and renal  
134 BAGs (rs55925606, position: 25878848 at 6p22.2) was close with each other on the human  
135 genome. Bayesian colocalization<sup>20</sup> analyses (**Method 3h**) supported two distinct causal SNP  
136 within this locus with the liver and musculoskeletal BAGs. Our results showed a posterior  
137 possibility (PP) of two distinct causal variants (PP.H3.ABF=0.744) or one shared causal variant  
138 (PP.H4.ABF=0.256) associated with both traits in the *GPLD1* gene, although the PP.H4.ABF  
139 hypothesis did not achieve the suggested threshold (>0.8)<sup>20</sup>. Detailed results are presented in  
140 **Supplementary eFigure 10**. However, note that these loci on chromosome 6 are near the major  
141 histocompatibility complex (MHC) region; further dedicated analyses are needed to understand  
142 the underlying genetics across different BAGs (e.g., pleiotropy).

143 Many of these loci were mapped to protein-encoding genes and provided functional  
144 insights. For example, the top lead SNP (rs62401887 at 6p22.3) within the locus of the hepatic  
145 BAG was mapped to the *MRS2* gene by position (with a deleterious score of 14.89) and  
146 expression quantitative trait loci (eQTL, P-value=1.09x10<sup>-10</sup>) (**Method 3c**), which enables  
147 magnesium ion transmembrane transporter activity. We illustrate the regional Manhattan plot for  
148 the genomic locus with the highest significance for each organ BAG in **Supplementary eFigure**  
149 **11**. For instance, the brain BAG exhibited a highly significant locus (top lead SNP: rs371185851  
150 at 17q21.31) with multiple protein-encoding genes, including the widely recognized *MAPT* gene  
151 encoding tau protein associated with neurodegenerative diseases, such as Alzheimer's disease  
152 (AD)<sup>21</sup>. Moreover, the SNPs within this locus included enhancers and transcription start sites  
153 specific to brain tissue chromatin states, highlighting their functional relevance in brain-related  
154 processes (**Supplementary eFigure11a**).



155 **Figure 1: Genomic loci associated with the nine biological age gaps**

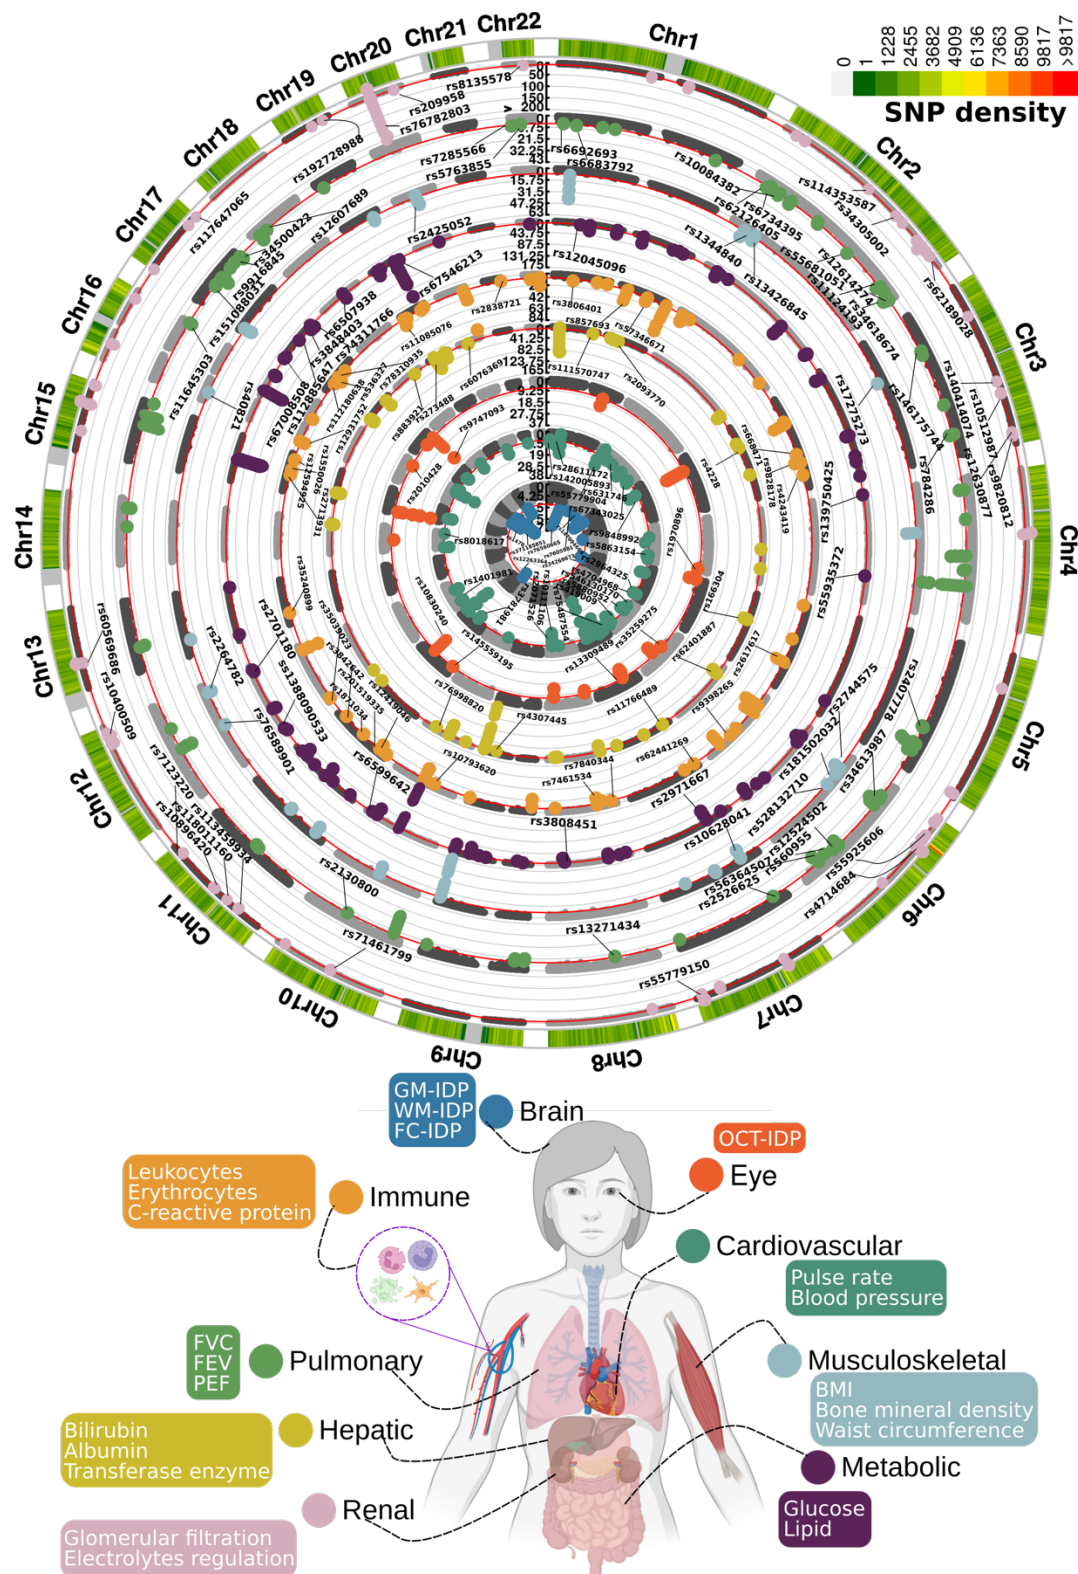

156 Organ-specific biological age gap (BAG) was derived from a large cohort of 30,108 to 111,543  
 157 European ancestry participants from the UK Biobank cohort. The nine organ systems include the  
 158

159 brain ( $N=30,108$ ), cardiovascular ( $N=111,543$ ), eye ( $N=36,004$ ), hepatic ( $N=111,543$ ), immune  
160 ( $N=111,543$ ), metabolic ( $N=111,543$ ), musculoskeletal ( $N=111,543$ ), pulmonary ( $N=111,543$ ),  
161 and renal ( $N=111,543$ ) BAGs. 393 genomic loci-BAG pairs were identified using a genome-wide  
162 P-value threshold [ $-\log_{10}(\text{P-value}) > 7.30$ ]. For visualization purposes, we denoted the genomic  
163 loci using their top lead SNPs that are not associated with any clinical traits in the EMBL-EBI  
164 GWAS Catalog. The anatomical illustration of the human body was created using  
165 [BioRender.com](https://www.biorender.com). All analyses used the Genome Reference Consortium Human Build 37  
166 (GRCh37). We present representative features employed in the calculation of each organ organ's  
167 BAG. BMI: body mass index; IDP: imaging-derived phenotype; GM: gray matter; WM: white  
168 matter; FC: functional connectivity; OCT: optical coherence tomography; FVC: forced vital  
169 capacity; FEV: forced expiratory volume; PEF: peak expiratory flow.

170

## 171 **Phenome-wide associations demonstrate organ system specificity and inter-organ**

### 172 **connection**

173 We aimed to investigate the agreement of the identified genomic loci in existing GWAS  
174 literature. To this end, we performed a phenome-wide association query in the EMBL-EBI  
175 GWAS Catalog<sup>22</sup> for independent significant SNPs within each locus, considering linkage  
176 disequilibrium and redundant associations (**Method 3d**).

177 This pheno-wide associations query identified 11,709 significant associations between  
178 the identified loci in our GWAS and clinical traits in the literature linked to each organ system  
179 (i.e., BAG-organ specificity) (**Fig. 2a**). The genomic loci associated with the brain BAG  
180 exhibited the highest proportion of associations (74 out of 173) with traits related to the brain,  
181 including imaging-derived phenotypes such as brain volume metrics and white matter  
182 microstructure, demonstrated in the keyword cloud presented in **Fig. 2a**. The brain BAG loci  
183 were also largely linked to many other traits related to other organ systems and chronic diseases,  
184 evidencing inter-organ connections, including metabolic ( $N=43/173$ , e.g., cholesterol levels),  
185 lifestyle factor ( $N=1/173$ , i.e., alcohol consumption), neurodegenerative traits ( $N=16/173$ , e.g.,  
186 AD), and immune ( $N=7/173$ , e.g., lymphocyte count). For the eye BAG loci, most associations  
187 were found in the eye ( $N=31/128$ , e.g., retinal nerve fiber layer thickness) and brain traits  
188 ( $N=6/128$ , e.g., brain morphology), among others.

189 For the seven body organ systems, among the loci associated with the cardiovascular  
190 BAG, most associations were observed with cardiovascular traits (319 out of 439), such as  
191 systolic/diastolic blood pressure and coronary artery disease. Other associations were found with  
192 musculoskeletal ( $N=30/439$ ), metabolic ( $N=14/439$ ), immune ( $N=6/439$ ), renal ( $N=18/1890$ ), and  
193 brain ( $N=9/439$ ) traits. 376 out of 1853 associations were related to hepatic traits (e.g., blood  
194 protein, cirrhosis, and bilirubin) for the hepatic BAG loci. Among the loci associated with the  
195 immune BAG, abundant associations were found in metabolic (929 out of 1773), immune  
196 ( $N=244/1773$ ), hepatic ( $N=149/1853$ ), musculoskeletal ( $N=57/1853$ ), and cardiovascular traits  
197 ( $N=72/1853$ ). For the metabolic BAG loci, most associations were observed in metabolic traits  
198 (3841 out of 4907). We found a significant intertwining of metabolic systems with other organ  
199 systems, highlighting inter-organ connections in human metabolic activities. Details of the  
200 phenome-wide associations are presented in **Supplementary eFile 6**. Furthermore, we reported  
201 the complementary results of this phenome-wide association query using the GWAS Atalas<sup>23</sup>  
202 platform (**Supplementary eText 2** and **Supplementary eFile 7**).

203

## 204 The SNP-based heritability estimates of the nine biological age gaps

205 We estimated the SNP-based heritability ( $h^2$ ) across the nine organ systems using the full sample  
206 sizes (**Fig. 2b**) of the nine BAGs. Additionally, the distributions of the magnitude of the  $\beta$   
207 coefficient in GWAS and the allele frequency of the alternative allele (effect allele) are shown in  
208 **Fig. 2c** and **d**. Notably, the sample sizes of the brain and eye BAGs were much smaller than that  
209 of the seven body organ BAGs; the body organ BAGs had the same populations.

210 Upon analyzing the full sample sizes, the estimated  $h^2$  for the brain BAG ( $0.47\pm 0.02$ )  
211 outperformed all other organ systems, followed by the eye ( $0.38\pm 0.02$ ), pulmonary ( $0.36\pm 0.006$ ),  
212 renal ( $0.31\pm 0.006$ ), metabolic ( $0.29\pm 0.006$ ), cardiovascular ( $0.27\pm 0.006$ ), musculoskeletal  
213 ( $0.24\pm 0.006$ ), hepatic ( $0.23\pm 0.006$ ), and immune BAGs ( $0.21\pm 0.006$ ) (**Fig. 2b**). All heritability  
214 estimates were statistically significant after controlling for multiple comparisons using the  
215 Bonferroni correction. This trend persisted when subsampling the population of other BAGs to  
216 match that of the brain BAG, with comparable distributions in sex and age (**Supplementary**  
217 **eFigure 12a**). Detailed results of the  $h^2$  estimate are presented in **Supplementary eTable 1a-b**.  
218 Of note, we employed the GCTA<sup>24</sup> software to estimate  $h^2$ , acknowledging that previous  
219 research<sup>25,26</sup> has demonstrated variations in the magnitude of  $h^2$  estimates based on the choice of  
220 methods.

221 To gain deeper insights into the significant genetic signals in the brain and eye, we  
222 conducted a detailed examination of the effect sizes ( $\beta$  coefficient) in the GWAS of the nine  
223 BAGs, as the effect size is independent of the sample size. The independent significant SNPs of  
224 the brain ( $|\beta|=0.062\pm 0.013$ ; [0.0470, 0.093]) and eye ( $|\beta|=0.0645\pm 0.030$ ) BAG showed larger  
225 mean magnitudes than the seven body organ systems (**Fig. 2c**). Among the body organ BAGs  
226 with the same sample size, the renal BAG showed the largest effect size ( $0.023<|\beta|<0.306$ ). This  
227 pattern persisted with the results using the subsampled populations to the brain BAGs, presented  
228 in **Supplementary eFigure 12b**. The full set of statistics (e.g.,  $\beta$  coefficient) of the independent  
229 significant SNPs is detailed in **Supplementary eFile 5** for the European ancestry GWAS.

230 It is widely recognized that the effect size of common genetic variants tends to increase  
231 as the allele frequency decreases<sup>27,28</sup>. This “inverse relationship” was evidenced by our data  
232 using independent significant SNPs from the 9 BAGs (**Supplementary eFigure 13**); the SNP  
233 with a lower allele frequency requires a larger sample size to achieve statistical significance. We  
234 then hypothesized that the smaller sample sizes of the brain and eye BAGs enabled us to detect  
235 significant variants with a relatively higher allele frequency but could not identify the SNPs with  
236 a relatively lower allele frequency associated with the body organ BAGs. As shown in **Fig. 2d**,  
237 we observed that the alternative (effect) allele frequency of the independent significant SNPs  
238 associated with the brain and eye BAGs was relatively higher than that of the body organ BAGs.  
239 This indicates that larger samples are required for the brain and eye to detect SNP effects with a  
240 relatively lower allele frequency. This relationship persisted by subsampling the population of  
241 other BAGs to that of the brain BAGs, which is presented in **Supplementary eFigure 12c**. As  
242 expected, the  $\beta$  coefficients derived from the whole samples ( $N>10k$  for body organ BAGs) were  
243 not significantly different from the results using the brain-BAG comparable down-sampled  
244 samples ( $N=30,108$ ) (**Supplementary eTable 2**).

245 Another hypothesis is that the features used to compute the brain and eye BAGs – *in vivo*  
246 imaging features – are more heritable than those of the body-organ systems. We compared the  
247 genetic structure of the nine BAGs and the individual features used to compute the BAGs. This  
248 comparison is crucial for gaining insights into how the choice of predictors impacts the results of  
249 BAG GWAS, which, in turn, is fundamental for subsequent analyses related to pleiotropy and



250 trait associations. We first estimated the SNP-based heritability for four pulmonary features and  
251 compared these with a set of multimodal brain imaging-derived phenotypes from our previous  
252 studies<sup>14,29–32</sup> using the same GCTA software. We hypothesized that the brain imaging features  
253 would exhibit a higher degree of heritability than the 4 pulmonary features of the pulmonary  
254 BAG (i.e., forced vital capacity, forced expiratory volume, peak expiratory flow, and the ratio of  
255 forced expiratory volume to forced vital capacity), supported by the results in **Supplementary**  
256 **eTable 1c**. We then performed GWAS for the four pulmonary features within the European  
257 ancestry populations. The Manhattan and QQ plots are presented in **Supplementary eFigure 14**.  
258 The pulmonary BAG showed high genetic correlations using LDSC with the four pulmonary  
259 features ( $-0.79 < g_c < 0.83$ , **Supplementary eTable 3**). Using Bayesian colocalization analysis  
260 (**Method 3h**), we identified 99 potential causal variants ( $PP.H4.ABF > 0.80$ ) between the  
261 pulmonary BAG and the four underlying features (**Supplementary eFile 8**). We showcased one  
262 causal variant evidenced at one locus (4q24) between the pulmonary BAG and the FEV/FCV  
263 feature (**Supplementary eFigure 15**). The  $PP.H4.ABF$  (0.99) denotes the posterior probability  
264 of hypothesis H4, which suggests that both traits share the same causal SNP (rs7664805, mapped  
265 gene: *NPNT*). SNPs in linkage disequilibrium with the causal SNP were previously linked to  
266 chronic obstructive pulmonary disease in the GWAS Catalog. To elucidate the genetic overlap at  
267 the individual SNP level, we showed the  $\beta$  coefficient of the 48 potential causal variants that  
268 passed the genome-wide significance for the pulmonary BAG and at least one pulmonary feature  
269 in **Supplementary eFigure 16**.

270 **Figure 2: Phenome-wide associations of the identified genomic loci and SNP-wide**  
 271 **heritability estimates of the nine biological age gap**  
 272

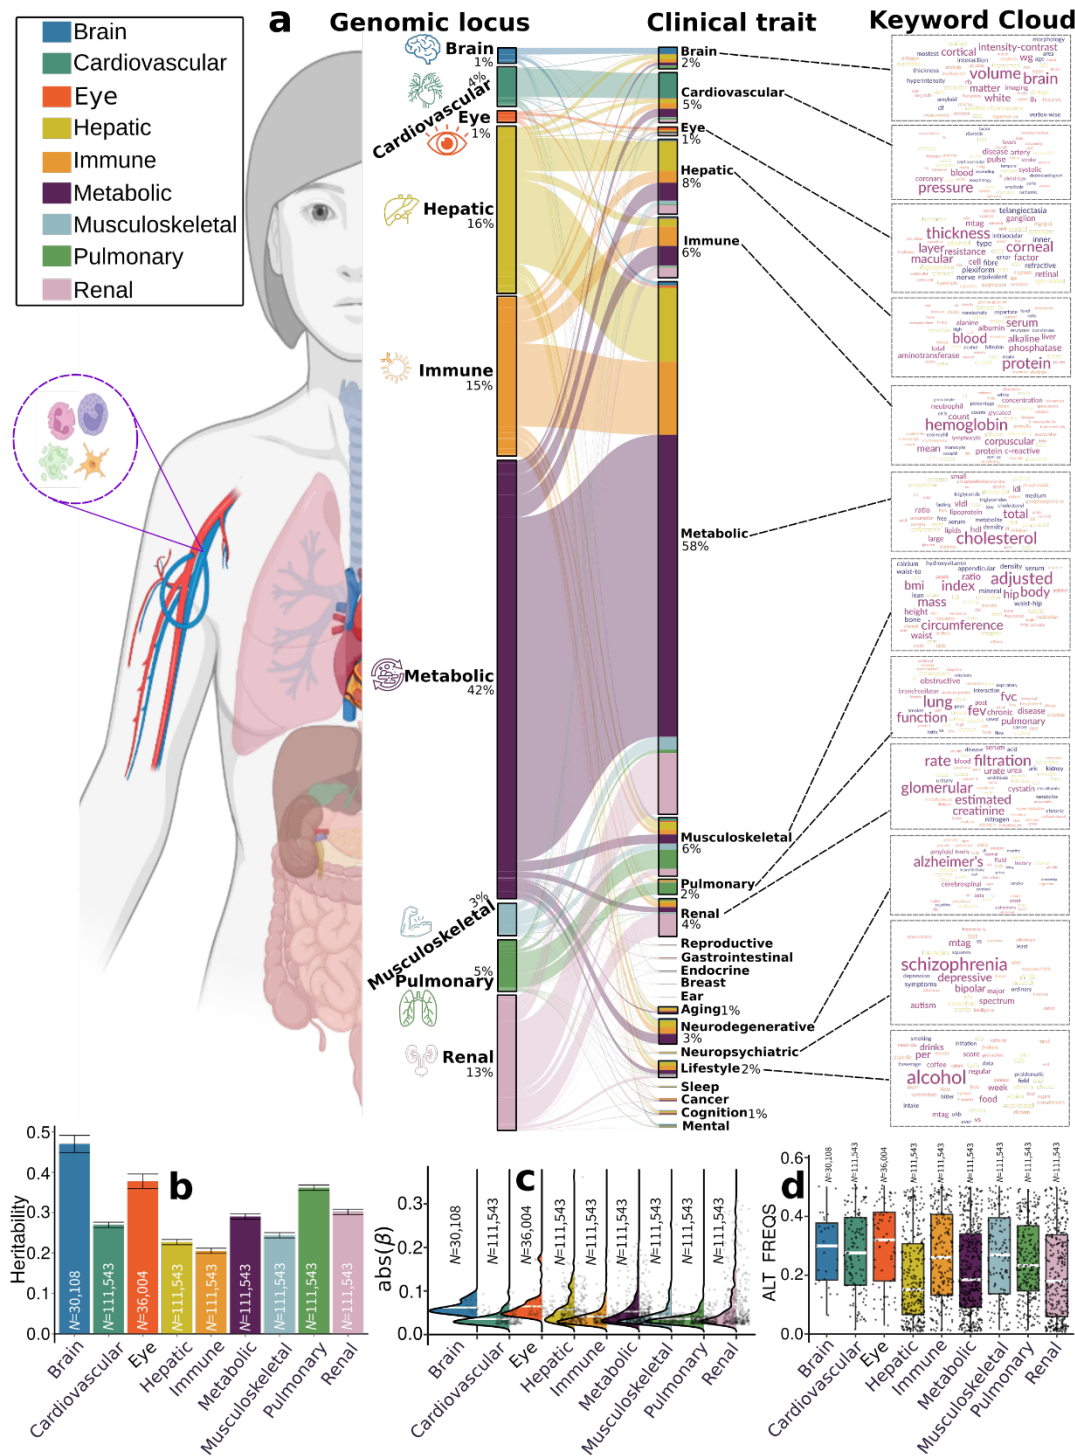

273 **a)** Phenome-wide association query of the identified genomic loci in the EMBL-EBI GWAS  
 274 Catalog (query date: 24<sup>th</sup> April 2023, via FUMA version: v1.5.4) showed an organ-specific and  
 275 inter-organ landscape. By examining the independent significant SNPs considering linkage  
 276 disequilibrium (**Method 3d**) within each genomic locus, we linked them to various clinical traits.  
 277

278 These traits were categorized into high-level groups encompassing different organ systems,  
279 neurodegenerative and neuropsychiatric disorders, and lifestyle factors. To visually represent the  
280 findings, we generated keyword cloud plots based on the frequency of these clinical traits within  
281 each BAG. The length of each rectangle block indicates the number of associations concerning  
282 the genomic loci in our analysis and clinical traits in the literature. The individual disease traits  
283 were categorized within their respective organ systems. However, this categorization doesn't  
284 imply that the sum of these diseases exclusively represents the entirety of the organ system or  
285 that these diseases are solely associated with one specific organ system. Additional searches on  
286 alternative public GWAS platforms, such as the GWAS Atlas, are provided in **Supplementary**  
287 **eText 2. b)** Brain BAG is more heritable than other organ systems using GCTA<sup>24</sup>. **c)** Brain BAG  
288 showed larger effect sizes of the independent significant SNPs than other organ systems. The  
289 kernel density estimate plot shows the distribution of the effect sizes (i.e., the magnitude of the  
290 linear regression  $\beta$  coefficients) in the nine GWAS. The white horizontal lines represent the  
291 mean effect sizes. **d)** The distribution of the alternative allele frequency (effect allele) for the  
292 nine BAGs. Of note, only independent significant SNPs were shown for each BAG in Figures **c-**  
293 **d**. All results in Figures **b-d** used the original full sample sizes of the nine BAGs; the brain, eye,  
294 and other body organ BAGs have different sample sizes. Error bars represent the standard error  
295 of the estimated parameters. Results for Figure **b-d** using the down-sampled sample sizes  
296 ( $N=30,108$  of the brain BAG) are shown in **Supplementary eFigure 12**. ALT FREQS: allele  
297 frequency of the alternative (effective) allele.  
298

## 299 **Genes linked to the nine biological age gaps are implicated in organ system-specific** 300 **biological pathways**

301 To biologically validate our GWAS findings at the gene level, we performed gene-based  
302 associations using the MAGMA<sup>33</sup> software based on the full P-value distribution from the  
303 GWAS of the nine BAGs. The significantly associated genes (**Supplementary eFile 9**) were  
304 used for the gene set enrichment analysis (GSEA, **Method 3e**) to annotate relevant biological  
305 pathways underlying each organ system (**Fig. 3a**).

306 Genes associated with the cardiovascular BAG were implicated in the insulin-like growth  
307 factor II binding (IGF-II) pathway ( $P\text{-value}=7.08\times 10^{-7}$ ). Genes associated with the eye BAG  
308 were enriched in the pathway of forebrain dorsal-ventral pattern (FDVP) formation ( $P\text{-}$   
309  $\text{value}=6.46\times 10^{-7}$ ). Among others, the most significant enrichment result shown in the hepatic  
310 BAG was the flavonoid glucuronidation pathway ( $P\text{-value}=1.71\times 10^{-8}$ ). Genes linked to the  
311 metabolic BAG displayed enrichment in several pathways, including the flavonoid  
312 glucuronidation pathway ( $P\text{-value}=2.46\times 10^{-15}$ ) and triglyceride-rich lipoprotein particle clearance  
313 pathway ( $P\text{-value}=3.72\times 10^{-15}$ ), both of which are implicated in liver function. In addition, the  
314 neutral lipid metabolic process, regulated by complex pathways featuring lipid metabolism  
315 enzymes and structural proteins, was also identified. Genes associated with the musculoskeletal  
316 BAG exhibited enrichment in the gene set in an amplicon at 20q11 ( $P\text{-value}=1.54\times 10^{-15}$ ), defined  
317 by a study of copy number alterations conducted on 191 patients with breast tumors<sup>34</sup>. Genes  
318 associated with the pulmonary BAG displayed significant enrichment in the pathways of the  
319 negative regulation biosynthetic process ( $P\text{-value}=3.72\times 10^{-10}$ ), consistent with a previous DNA  
320 methylation analysis of pulmonary function using old-aged Chinese monozygotic twins<sup>35</sup>. Genes  
321 associated with the renal BAG were implicated in the xenobiotic glucuronidation pathway ( $P\text{-}$

322 value= $1.56 \times 10^{-6}$ ). Given that the kidney contains most enzymes metabolizing foreign substances  
323 (i.e., xenobiotics), it plays a crucial role in the overall metabolism of drugs and other foreign  
324 compounds within the body (**Fig. 3a**). Detailed results of GSEA are presented in  
325 **Supplementary eFile 10**. Sex-stratified results are presented in **Supplementary eFigure 17**.  
326

### 327 **Genes linked to the nine biological age gaps display organ system-specific gene expression** 328 **patterns**

329 To investigate the gene expression patterns of the significant genes associated with the nine  
330 BAGs, we performed a tissue-specific gene expression analysis<sup>33</sup> using MAGMA and the GTEx  
331 RNA-seq dataset<sup>36</sup> (**Method 3f**).

332 Across 54 human organ tissues (**Fig. 3b**), genes associated with the cardiovascular BAG  
333 exhibited significant overexpression in various heart-related tissues (e.g., the aorta and tibial  
334 artery) and other organs (e.g., the uterus and colon sigmoid). Genes associated with the hepatic  
335 BAG were overexpressed in the liver and adipose subcutaneous. Several immune system-related  
336 tissues showed a high average expression of the genes related to the immune BAG, including the  
337 spleen, blood, and lymphocytes. Likewise, the genes associated with the metabolic BAG showed  
338 a high expression level in the liver and intestine – critical organs in the metabolic system. The  
339 genes related to the pulmonary BAG displayed significant overexpression in the esophagus  
340 gastroesophageal junction, artery, and others. The genes associated with the renal BAG were  
341 overexpressed in the kidney. Detailed results are presented in **Supplementary eFile 11**. Sex-  
342 stratified results are presented in **Supplementary eFigure 18**.

343 **Figure 3: Gene-level biological pathway annotation and tissue-specific gene expression**

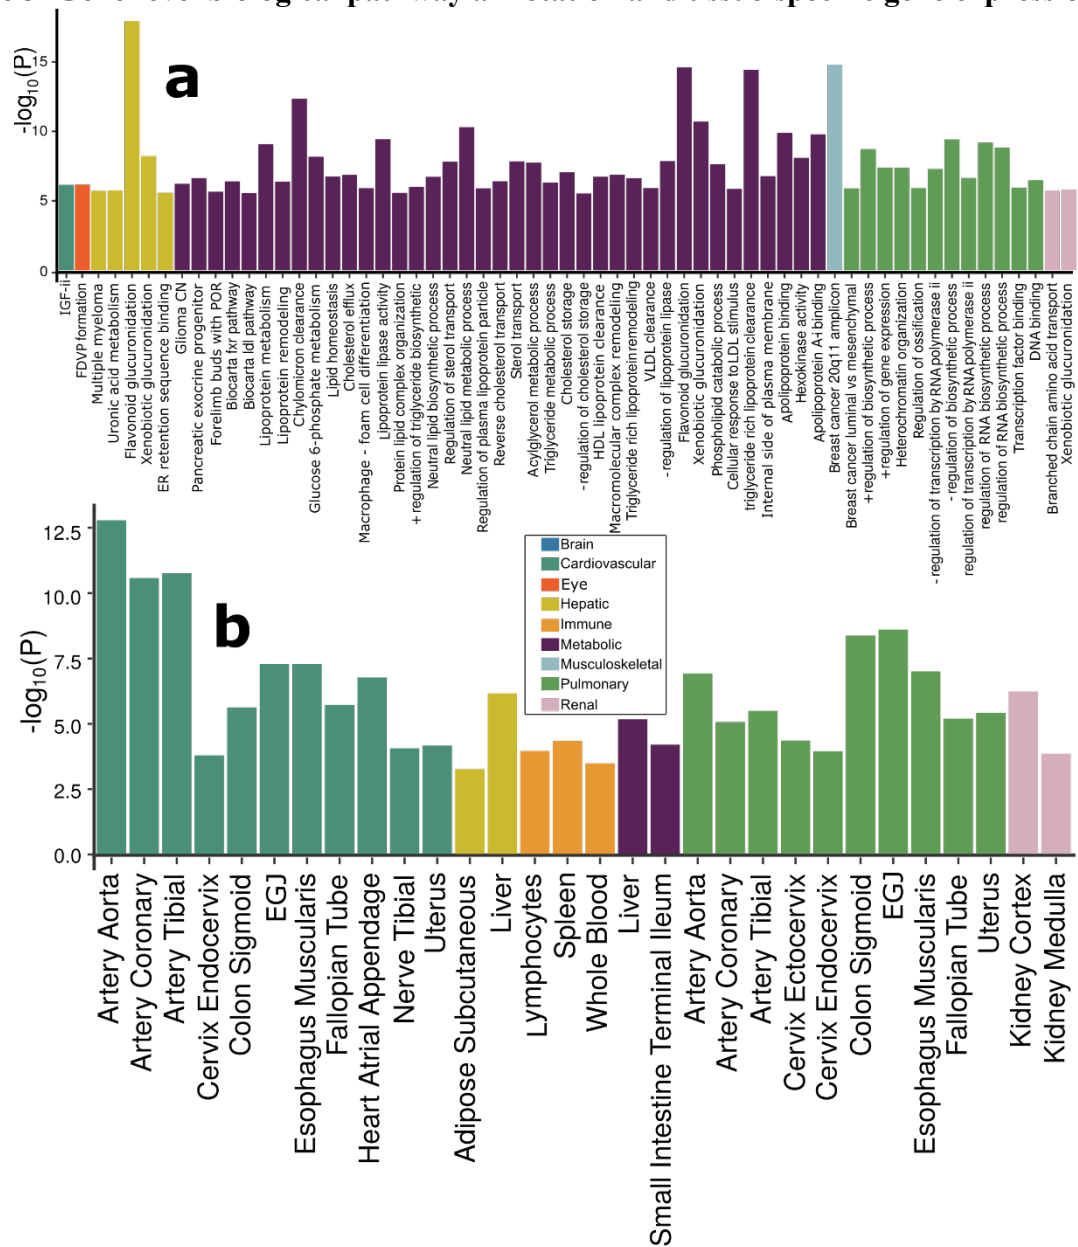

344 **a)** Validation of the nine BAGs in gene set enrichment analyses. Gene set enrichment analyses  
 345 were performed using curated gene sets and GO terms from the MsigDB database. **b)** Validation  
 346 of the nine BAGs in gene-property analyses. Gene-property analyses evaluate tissue-specific  
 347 gene expressions for the nine BAG-related genes using the full SNP P-values distribution. Only  
 348 significant gene sets are presented after adjusting for multiple comparisons using the Bonferroni  
 349 correction. Abbreviation: EGJ: esophagus gastroesophageal junction.  
 350  
 351  
 352



353 **Gene-drug-disease network substantiates potentially repositionable drugs for aging-related**  
354 **diseases**

355 We performed a drug target enrichment analysis<sup>37</sup> for the genes linked to the nine BAGs in the  
356 targeted gene sets of drug categories using the DrugBank database<sup>38</sup>, thereby constructing a  
357 gene-drug-disease network of potentially repositionable drugs (**Method 3g**).

358 The constructed gene-drug-disease network (**Fig. 4**) identified significant interactions  
359 between 12 metabolic BAG-linked genes, 46 drugs, and many metabolic disorders encoded in  
360 the ICD10 code (E70-E90). For instance, the *PPARD* gene was the target gene of the PPAR- $\delta$   
361 agonist (SAR 351034, denoted in **Fig. 4**), which aimed to improve insulin sensitivity and lipid-  
362 related activities and battle against inflammation and oxidative stress, serving as actionable drugs  
363 for metabolic disorders, diabetes, and kidney and liver injury-related diseases<sup>39</sup>. Our results  
364 showed that genes associated with the metabolic BAG were used to develop drugs treating  
365 various other diseases – beyond metabolic disorders – related to multiple organ systems (**Fig. 4**).  
366 These included heart-related diseases (e.g., chronic rheumatic heart diseases for I05-I09) and  
367 cerebrovascular disease (I60-I69), although the enrichment did not survive correction for  
368 multiple comparisons (**Fig. 4**). For instance, the drug MPSK3169A (clinical trial number:  
369 NCT01609140; metabolic BAG linked gene: *PCSK9*) is used to treat cerebrovascular disease and  
370 coronary heart disease; T3D-959 (clinical trial number: NCT04251182; pulmonary BAG linked  
371 gene: *PPARD*), was a candidate drug targeting AD. Detailed results are presented in  
372 **Supplementary eFile 12**.

373 The drug-gene-disease network reveals the association between genes related to the  
374 metabolic BAG and drugs targeting various chronic diseases. It highlights the importance of the  
375 metabolic system in the overall functioning of the human body and the potentials of  
376 repositioning existing drugs to tackle biological aging.

377  
378

379 **Figure 4: Gene-drug-disease network of the nine biological age gaps**

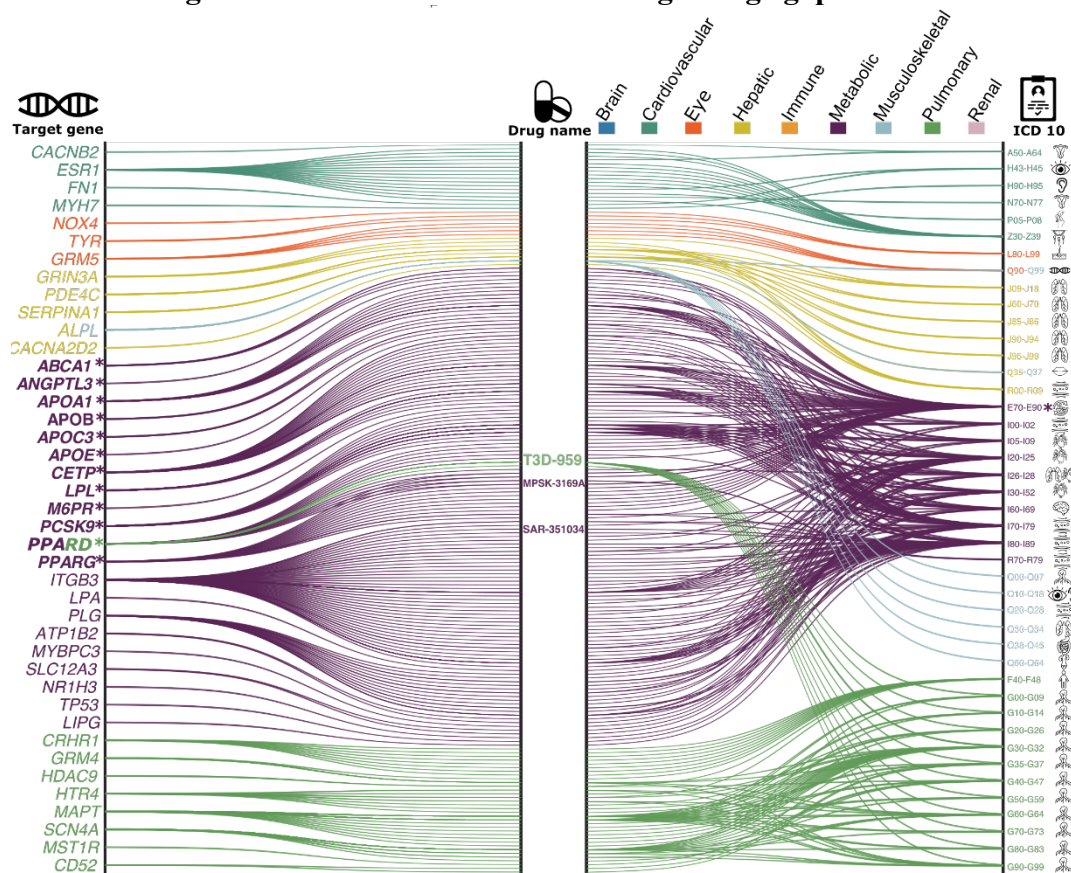

380  
 381 The gene-drug-disease network reveals a broad spectrum of gene, drug, and disease interactions  
 382 across the nine BAGs, highlighting the metabolic-related genes. The ICD-10 code icons  
 383 symbolize disease categories linked to the primary organ systems (e.g., G30 for Alzheimer's  
 384 disease in the CNS). All presented genes passed the nominal P-value threshold (<0.05) and were  
 385 pharmaco-genetically associated with drug categories in the DrugBank database; the symbol \*  
 386 indicates gene-drug-disease interactions that survived the Bonferroni correction. Abbreviation:  
 387 ICD: International Classification of Diseases; EGJ: esophagus gastroesophageal junction.

388  
389 **Heritability enrichment in different cell types, functional categories, tissue-specific gene**  
390 **expression, and chromatin states**

391 To further biologically validate our GWAS findings at the SNP level, we performed partitioned  
392 heritability analyses<sup>40</sup> (**Method 3i**) to estimate the heritability enrichment of genetic variants  
393 related to the nine BAGs concerning three different cell types<sup>41</sup> (i.e., neurons, oligodendrocytes,  
394 and astrocytes, **Fig. 5a**), 53 non-tissue-specific functional categories<sup>40</sup> (**Fig. 5b**), 205 tissue-  
395 specific gene expression data<sup>36</sup> (**Fig. 5c**) and 489 tissue-specific chromatin states<sup>42,43</sup> (**Fig. 5d**).

396 We found significant heritability enrichment in oligodendrocytes (P-value=0.03), a  
397 specific type of neuroglial cells, for the brain BAG. The cardiovascular BAG also exhibited  
398 significant heritability enrichment in neurons (P-value=0.01) (**Fig. 5a, Supplementary eFile**  
399 **13**). Concerning the heritability enrichment in non-tissue-specific functional categories, we  
400 exemplified the four highest significant partitioned heritability estimates for each BAG in **Fig.**  
401 **5b**. For the brain BAG, the super-enhancer regions employed 17.16% of SNPs to explain  
402  $0.47 \pm 0.04$  of SNP heritability (P-value= $1.80 \times 10^{-11}$ ), and the histone H3 at lysine 9  
403 (H3K9ac) regions used 12.61% of SNPs to explain  $0.61 \pm 0.12$  of SNP heritability (P-  
404 value= $2.96 \times 10^{-4}$ ). For the eye BAG, the super-enhancer regions explained  $0.39 \pm 0.05$  of SNP  
405 heritability (P-value= $2.12 \times 10^{-6}$ ) using 16.84% of SNPs. For the hepatic BAG, the H3K9ac  
406 regions explained  $0.69 \pm 0.13$  of SNP heritability (P-value= $3.60 \times 10^{-5}$ ) using 12.61% of SNPs. For  
407 the immune BAG, the TSS regions (i.e., core promoters) explained  $0.37 \pm 0.08$  of SNP heritability  
408 (P-value= $1.48 \times 10^{-6}$ ) using 1.82% of SNPs. The 3.11% of SNPs annotated by the promoter  
409 regions explained  $0.30 \pm 0.08$  of SNP heritability (P-value= $7.64 \times 10^{-4}$ ) for the metabolic BAG. For  
410 the cardiovascular (enrichment= $16.39 \pm 2.23$ ; P-value= $4.70 \times 10^{-11}$ ), musculoskeletal  
411 (enrichment= $17.34 \pm 4.08$ ; P-value= $1.65 \times 10^{-6}$ ), pulmonary (enrichment= $16.82 \pm 2.51$ ; P-  
412 value= $7.58 \times 10^{-9}$ ), and renal (enrichment= $13.96 \pm 1.88$ ; P-value= $7.25 \times 10^{-9}$ ) BAGs, the highest  
413 heritability enrichment was found in the regions conserved across mammals (**Fig. 5b,**  
414 **Supplementary eFile 14**). These results suggested disproportionate genomic contributions to the  
415 heritability of BAGs from multiple functional categories.

416 In addition, the nine BAGs showed high heritability enrichment in specific tissues  
417 corresponding to their organ systems. For example, the cardiovascular BAG showed significant  
418 heritability enrichment in multiple tissue types, including the artery (e.g., the aorta: P-  
419 value= $1.03 \times 10^{-7}$ ), myometrium (P-value= $1.35 \times 10^{-4}$ ), and uterus (P-value= $2.43 \times 10^{-4}$ ). Significant  
420 heritability enrichment was found in the liver for the hepatic (P-value= $5.60 \times 10^{-9}$ ) and metabolic  
421 BAGs (P-value= $6.24 \times 10^{-9}$ ). For the immune BAG, significant heritability enrichment was found  
422 in fetal blood tissues (P-value= $7.36 \times 10^{-9}$ ) (**Fig. 5c, Supplementary eFile 15**). These findings  
423 were aligned with the tissue-specific gene expression patterns observed at the gene level (**Fig.**  
424 **3b**).

425 The results from multi-tissue chromatin states-specific data further provide the proof-of-  
426 concept for the organ-specific heritability enrichment among these nine BAGs. For the brain  
427 BAG, significant heritability enrichment was found in multiple brain tissues in the H3K4me3  
428 (e.g., P-value= $9.06 \times 10^{-5}$  for the hippocampus), H3K4me1 (e.g., P-value= $6.94 \times 10^{-5}$  for the  
429 hippocampus), and H3K27ac (e.g., P-value= $1.15 \times 10^{-5}$  for the anterior caudate) regions. For the  
430 cardiovascular BAG, significant heritability enrichment was shown in the right ventricle in the  
431 H3K4me3 region (P-value= $6.36 \times 10^{-5}$ ) and the artery aorta in the H3K27ac region (P-  
432 value= $5.81 \times 10^{-7}$ ). Significant heritability enrichment was found in primary hematopoietic stem

433 cells in the H3K4me1 region for the immune BAG for both females (P-value= $5.61 \times 10^{-5}$ ) and  
434 males (P-value= $9.50 \times 10^{-5}$ ). The fetal leg muscle tissue in the DNase regions (P-value= $6.54 \times 10^{-5}$ )  
435 for the musculoskeletal BAG showed significant heritability enrichment. For the pulmonary  
436 BAG, significant heritability enrichment was found in the fetal lung in the H3K4me1 (P-  
437 value= $1.33 \times 10^{-9}$ ) and DNase regions (P-value= $3.80 \times 10^{-8}$ ), among other tissues from the  
438 stomach, artery, and muscle. For the renal BAG, significant enrichment was shown in the liver in  
439 the H3K9ac region (P-value= $2.46 \times 10^{-5}$ ) and the gastric tissues in the H3K27ac region (P-  
440 value= $6.24 \times 10^{-5}$ ) (**Fig. 5d, Supplementary eFile 16**).

441

442

#### 443 **Cheverud's Conjecture: genetic correlations between the nine biological age gaps mirror** 444 **their phenotypic correlations**

445 We estimated the genetic correlation ( $g_c$ ) (**Method 3h**) and the phenotypic correlation ( $p_c$  for  
446 Pearson's correlation coefficient) between each pair of the nine BAGs. Our results supported the  
447 long-standing Cheverud's Conjecture<sup>1</sup> – the genetic correlation between two clinical traits  
448 reflects their phenotypic correlation (**Fig. 5e**).

449 The musculoskeletal and hepatic BAGs showed the highest genetic correlation ( $g_c=0.40$ )  
450 and phenotypic correlation ( $p_c=0.38$ ). Similarly, the hepatic and renal BAGs showed a high  
451 genetic correlation ( $g_c=0.39$ ) and phenotypic correlation ( $p_c=0.37$ ). The musculoskeletal BAG  
452 also showed significant genetic and phenotypic correlations with pulmonary ( $g_c=0.35$ ,  $p_c=0.19$ )  
453 and renal BAGs ( $g_c=0.13$ ,  $p_c=0.21$ ). In addition, the eye BAG showed small genetic and  
454 phenotypic correlations with the brain BAG ( $g_c=0.15$ ,  $p_c=0.11$ ). The correlations between the  
455 brain and eye BAGs and other organ BAGs were relatively weaker than those observed among  
456 other organ pairs. These findings indicate the presence of shared genetic underpinnings that  
457 collectively contribute to the biological aging processes captured by these organ BAGs. Most of  
458 the genetic correlations showed consistency between females and males, albeit sex differences  
459 were evident in certain BAGs, particularly in the cardiovascular BAG results. Specifically, males  
460 exhibited dominant correlations between cardiovascular BAGs and hepatic and renal BAGs,  
461 while females demonstrated unique correlations with musculoskeletal and pulmonary BAGs  
462 (**Supplementary eFigure 19**). Sex differences in cardiovascular diseases have been explored in  
463 prior literature<sup>44</sup>, highlighting the divergent effects of factors associated with both sex and gender  
464 on the clinical presentations and outcomes of cardiovascular disease. Detailed results are  
465 presented in **Supplementary eFile 17**.

466

#### 467 **Genetic correlations between the nine biological age gaps and 41 clinical traits of chronic** 468 **diseases, cognition, and lifestyle factors**

469 We also estimated  $g_c$  between the nine BAGs and 41 clinical traits to examine their genetic  
470 correlations. The 41 clinical traits encompassed many common chronic diseases and conditions  
471 and their disease subtypes<sup>7,45–48</sup>, cognition (e.g., general intelligence and reaction time, and  
472 lifestyle factors (e.g., computer use) (**Fig. 5f and Supplementary eTable 4**).

473 The brain BAG was genetically associated with several brain diseases of the central  
474 nervous system (CNS) and their subtypes, including AD ( $g_c=0.37 \pm 0.14$ ) and late-life depression  
475 (LLD,  $g_c=0.25 \pm 0.07$ ). Furthermore, we observed significant genetic correlations between the

476 brain BAG and years of education ( $g_c = -0.14 \pm 0.05$ ) and intelligence ( $g_c = -0.15 \pm 0.05$ ). The  
477 cardiovascular BAG was positively correlated with stroke ( $g_c = 0.20 \pm 0.05$ ), a significant  
478 cardiovascular disease, and was negatively correlated with years of education ( $g_c = -0.17 \pm 0.05$ ).  
479 The musculoskeletal BAG was positively correlated with hyperlipidemia ( $g_c = 0.18 \pm 0.06$ ),  
480 rheumatoid arthritis ( $g_c = 0.13 \pm 0.03$ ), and Crohn's disease ( $g_c = 0.19 \pm 0.06$ ) and was negatively  
481 correlated with atrial fibrillation ( $g_c = -0.11 \pm 0.04$ ), years of education ( $g_c = -0.21 \pm 0.04$ ), and  
482 intelligence ( $g_c = -0.18 \pm 0.03$ ). The pulmonary BAG was positively associated with  
483 hyperlipidemia ( $g_c = 0.12 \pm 0.04$ ), stroke ( $g_c = 0.15 \pm 0.05$ ), liver fat ( $g_c = 0.12 \pm 0.04$ ), and lung  
484 carcinoma ( $g_c = 0.17 \pm 0.05$ ). Finally, the renal BAG was positively correlated with chronic kidney  
485 disease ( $g_c = 0.39 \pm 0.06$ ) and atrial fibrillation ( $g_c = 0.09 \pm 0.03$ ). Notably, type 2 diabetes showed  
486 abundant positive genetic correlations with multiple BAGs, including the brain, cardiovascular,  
487 metabolic, pulmonary, and renal. Detailed results are presented in **Supplementary eFile 18**.  
488 Furthermore, we calculated the genetic correlation between the nine BAGs and longevity<sup>49</sup> and  
489 household income<sup>50</sup>. Our findings indicated that the cardiovascular ( $g_c = -0.16 \pm 0.09$ ) and  
490 pulmonary BAG ( $g_c = -0.12 \pm 0.07$ ) exhibited negative associations with longevity, defined as  
491 cases surviving at or beyond the age corresponding to the 90th survival percentile; the brain  
492 BAG ( $g_c = -0.21 \pm 0.04$ ), musculoskeletal ( $g_c = -0.29 \pm 0.03$ ), and pulmonary BAG ( $g_c = -0.16 \pm 0.03$ )  
493 were negatively genetically correlated with household income. We used GWAS summary  
494 statistics from a prior study<sup>51</sup> to detect a significant genetic correlation between the immune  
495 BAG ( $g_c = -0.13 \pm 0.03$ ), pulmonary BAG ( $g_c = -0.09 \pm 0.03$ ), and telomere length (**Supplementary**  
496 **eTable 5**).

497 These genetic correlations yield insights into potential shared mechanisms underlying the  
498 nine BAGs, their relationships with chronic diseases, particularly AD and type 2 diabetes, and  
499 cognition. These compelling results prompted us to explore the potential causal effects of these  
500 traits on the nine BAGs. In the subsequent section, we unbiasedly selected 17 clinical traits  
501 encompassing chronic diseases, cognition, and lifestyle factors to perform Mendelian  
502 randomization (**Method 3g**).



503 **Figure 5: Partitioned heritability enrichment and genetic correlation of the nine biological**  
 504 **age gaps**

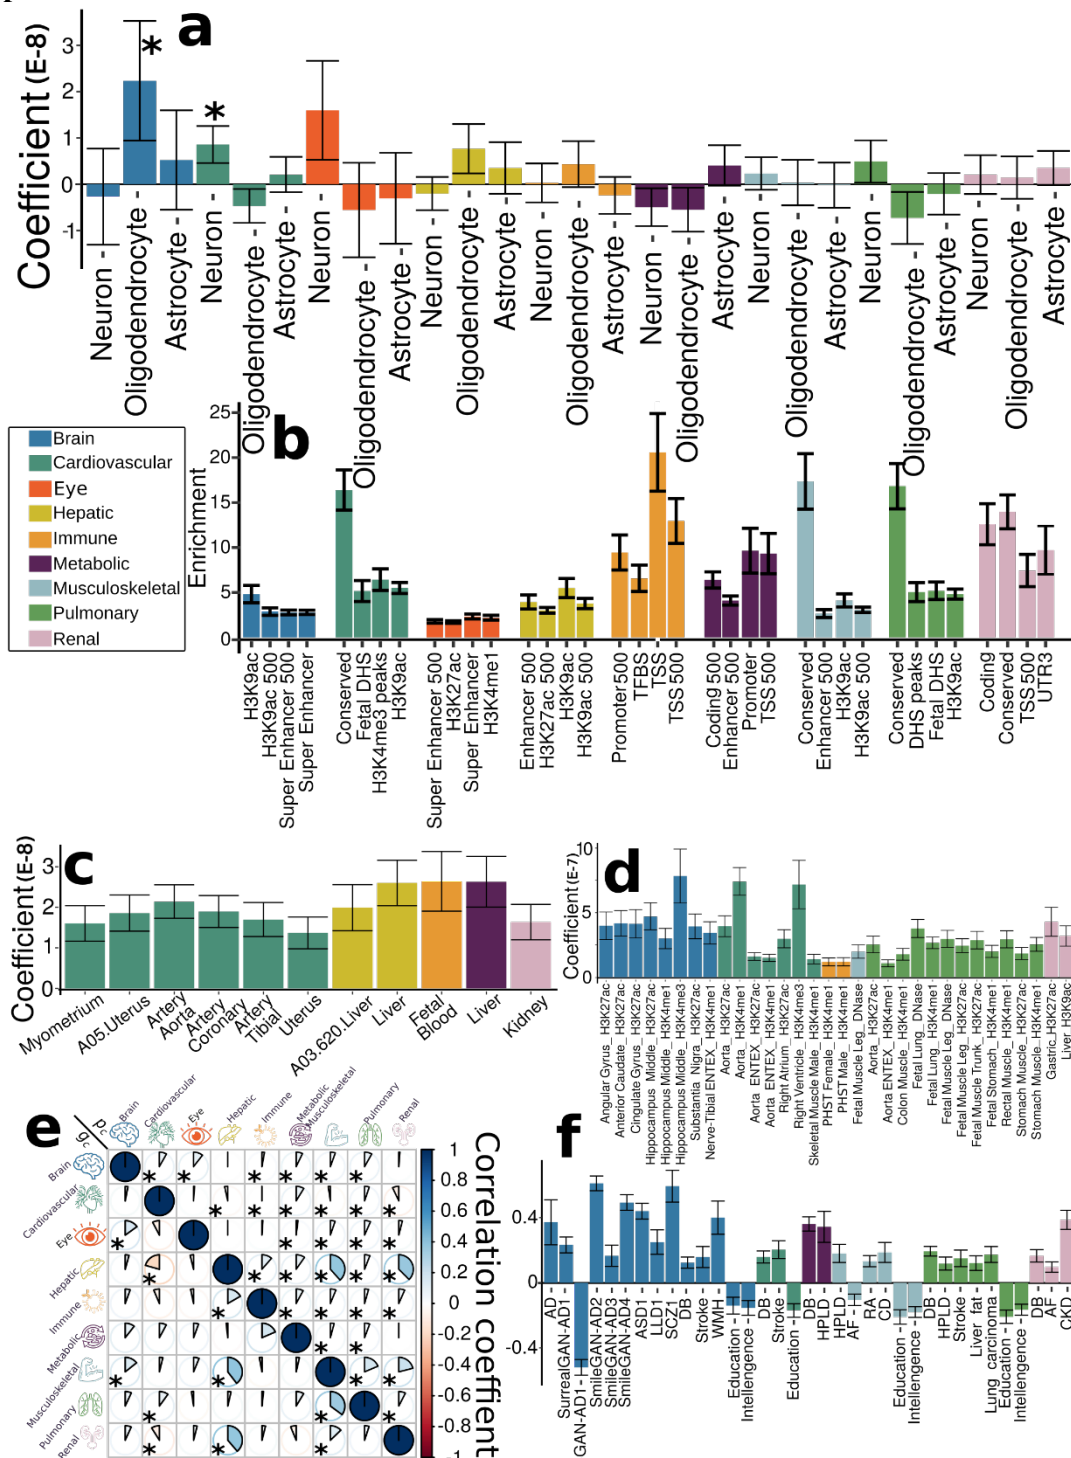

505 **a)** Cell type-specific partitioned heritability estimates for neurons, oligodendrocytes, and  
 506 **b)** Partitioned heritability estimates for the general 53 functional categories. For  
 507 visualization purposes, we only showed the four categories with the highest significant estimates  
 508 for each BAG. The label for 500 denotes a 500-bp window around each of the 24 main  
 509

510 annotations in the full baseline model, which prevents a biased estimate inflated by heritability in  
511 flanking regions<sup>52</sup>. **c)** Tissue-specific partitioned heritability estimates using gene sets from  
512 multi-tissue gene expression data. **d)** Tissue and chromatin-specific partitioned heritability  
513 estimates using multi-tissue chromatin data. **e)** Cheverud's Conjecture: the genetic correlation  
514 between two BAGs ( $g_c$ , lower triangle) mirrors their phenotypic correlation ( $p_c$ , upper triangle).  
515 **f)** Genetic correlations between the nine BAGs and 41 clinical traits, including chronic diseases  
516 and their subtypes involving multiple human organ systems, education, intelligence, and reaction  
517 time. The symbol \* denotes Bonferroni-corrected significance; the absence of \* indicates all  
518 results remain significant after correction. The standard error of the estimated parameters is  
519 presented using error bars. Abbreviation: AD: Alzheimer's disease; ASD: autism spectrum  
520 disorder; LLD: late-life depression; SCZ: schizophrenia; DB: type 2 diabetes; WMH: white  
521 matter hyperintensity; HPLD: hyperlipidemia; AF: atrial fibrillation; RA: rheumatoid arthritis;  
522 CD: Crohn's disease; CKD: chronic kidney disease.  
523

## 524 **Hepatic and musculoskeletal biological age gaps are causally associated with each other**

525 We performed two-sample bi-directional Mendelian randomization for each pair of BAGs by  
526 excluding overlapping populations to avoid bias<sup>16</sup> (**Method 3j**). We found that the hepatic and  
527 musculoskeletal BAGs showed a bi-directional causal relationship [from the hepatic BAG to the  
528 musculoskeletal BAG: P-value= $9.85 \times 10^{-7}$ , OR (95% CI) = 1.47 (1.26, 1.71); from the  
529 musculoskeletal BAG to the hepatic BAG: P-value= $1.54 \times 10^{-8}$ , OR (95% CI) = 2.78 (1.95, 3.97)]  
530 (**Fig. 6**). This causal relationship echoes our genetic correlation results: the musculoskeletal and  
531 hepatic BAGs showed the highest genetic correlation compared to other organ systems (**Fig. 5e**).  
532 Detailed results and sensitivity check results are presented in **Supplementary eFile 19** and  
533 **Supplementary eFigure 20** and **21**.

534 We performed three additional sensitivity check analyses for this bi-directional causal  
535 relationship. First, we reperformed the GWAS for hepatic BAG and musculoskeletal BAG,  
536 incorporating weight as a covariate due to its established causal associations with several organ  
537 systems (**Fig. 6**). This analysis reaffirmed this bi-directional causal relationship (**Supplementary**  
538 **eText 3A**). Furthermore, we performed Mendelian randomization by excluding the common  
539 SNP within the *APOE* gene (rs429358) due to its pleiotropic effects. This analysis underscored  
540 the robustness of the potential causal relationship from the hepatic BAG to the musculoskeletal  
541 BAG, both with and without including this SNP as an instrumental variable, as elaborated in  
542 **Supplementary eText 3B**. Finally, the latent causal variable (LCV<sup>53</sup>, **Method 3j**) model  
543 confirmed a partially genetically causal effect from the hepatic BAG to the musculoskeletal  
544 BAG [genetic causality proportion =  $0.75 \pm 0.14$ ,  $-\log_{10}(\text{P-value}) = 11.0$ ,  $g_c = 0.41 \pm 0.06$ ]  
545 (**Supplementary eTable 6**).  
546  
547

## 548 **Biological age gaps are causally associated with several chronic diseases, body weight, and** 549 **sleep duration**

550 We investigated the bi-directional causal effects between chronic diseases (e.g., AD) and  
551 lifestyle factors (e.g., sleep duration) and the nine BAGs. We unbiasedly and systematically  
552 included 17 clinical traits (**Method 3j**) guided by our genetic correlation results (**Fig. 5f**). The 17

553 clinical traits included chronic diseases linked to the brain, cardiovascular, metabolic, digestive,  
554 renal, and musculoskeletal systems, cognition, and lifestyle factors (**Supplementary eTable 7**).

555 In the forward Mendelian randomization, we found potential causal effects of AD on the  
556 brain [P-value= $3.99 \times 10^{-8}$ , OR (95% CI) = 1.05 (1.03, 1.06), number of SNPs=10], hepatic [P-  
557 value= $7.53 \times 10^{-7}$ , OR (95% CI) = 1.03 (1.02, 1.04), number of SNPs=10], musculoskeletal [P-  
558 value= $1.73 \times 10^{-5}$ , OR (95% CI) = 0.98 (0.97, 0.99), number of SNPs=10], and renal [P-  
559 value= $5.71 \times 10^{-4}$ , OR (95% CI) = 0.98 (0.97, 0.99), number of SNPs=10] BAGs. Body weight  
560 showed causal effects on multiple organ systems, including the immune [P-value= $8.96 \times 10^{-5}$ , OR  
561 (95% CI) = 1.08 (1.04, 1.11), number of SNPs=160], musculoskeletal [P-value= $4.32 \times 10^{-15}$ , OR  
562 (95% CI) = 0.83 (0.79, 0.86), number of SNPs=160], pulmonary [P-value= $3.50 \times 10^{-7}$ , OR (95%  
563 CI) = 0.84 (0.79, 0.90), number of SNPs=160], and renal BAGs [P-value= $4.53 \times 10^{-13}$ , OR (95%  
564 CI) = 1.18 (1.13, 1.23), number of SNPs=160]. In addition, we also found that Crohn's disease  
565 had causal effects on the hepatic BAG [P-value= $3.00 \times 10^{-3}$ , OR (95% CI) = 1.02 (1.00, 1.03),  
566 number of SNPs=77], type 2 diabetes on the metabolic BAG [P-value= $9.92 \times 10^{-12}$ , OR (95% CI)  
567 = 1.16 (1.09, 1.24), number of SNPs=8], inflammatory bowel disease [P-value= $1.42 \times 10^{-3}$ , OR  
568 (95% CI) = 1.02 (1.00, 1.03), number of SNPs=80] and primary biliary cholangitis [P-  
569 value= $7.41 \times 10^{-4}$ , OR (95% CI) = 1.02 (1.00, 1.03), number of SNPs=16] on the musculoskeletal  
570 BAG (**Fig. 6**).

571 For the inverse Mendelian randomization, we found potential causal effects of the  
572 metabolic [P-value= $6.85 \times 10^{-4}$ , OR (95% CI) = 0.94 (0.91, 0.97), number of SNPs=71] and  
573 pulmonary [P-value= $3.79 \times 10^{-5}$ , OR (95% CI) = 0.84 (0.79, 0.91), number of SNPs=62] BAGs on  
574 body weight, the cardiovascular BAG on triglycerides versus lipid ratio in very large very-low-  
575 density lipoprotein (VLDL) [P-value= $2.14 \times 10^{-4}$ , OR (95% CI) = 1.09 (1.04, 1.14), number of  
576 SNPs=39], and the brain BAG on sleep duration [P-value= $2.61 \times 10^{-3}$ , OR (95% CI) = 1.09 (1.04,  
577 1.14), number of SNPs=10] (**Fig. 6**). Detailed results are presented in **Supplementary eFile 20**.

578 We performed several sensitivity analyses (**Method 3j**) to test the robustness of our  
579 findings. Based on these sensitivity checks, we identified potential outlier instrumental variables  
580 (IVs, i.e., SNPs) for four Mendelian randomization tests (AD and body weight on  
581 musculoskeletal BAG, Crohn's disease on hepatic BAG, and type 2 diabetes on metabolic BAG)  
582 in the forward Mendelian randomization and one Mendelian randomization test (metabolic BAG  
583 on body weight) in the inverse Mendelian randomization. Detailed results of the sensitivity check  
584 are presented in **Supplementary eFigure 22-37** for all significant results. We showcased a  
585 detailed analysis of the sensitivity results for the metabolic BAG on body weight in  
586 **Supplementary eText 3C**. In summary, the potential causal link from the metabolic BAG to  
587 body weight remained robust across several sensitivity checks despite the identification of two  
588 potential outlier instrumental variables, namely, rs117233107 and rs33959228.

589 In addition, we used the LCV method and found a partially genetically causal effect from  
590 longevity (99th survival percentile) to the brain BAG (genetic causality proportion =  $0.45 \pm 0.20$ ,  
591 P-value=0.04). Importantly, we selected the LCV method over Mendelian randomization  
592 because of the partial population overlap between the longevity GWAS summary statistics and  
593 our BAG GWAS summary statistics. The LCV analysis also detected a partially genetically  
594 causal effect from telomere length to the immune BAG (genetic causality proportion =  $0.33 \pm 0.12$ ,  
595 P-value=0.0002) and the pulmonary BAG (genetic causality proportion =  $0.67 \pm 0.20$ , P-  
596 value= $3.57 \times 10^{-16}$ ) (**Supplementary eTable 6**).

597

598 **Figure 6: Causal multi-organ network between the 9 biological age gaps and 17 clinical**  
599 **traits of chronic diseases, lifestyle factors, and cognition**  
600

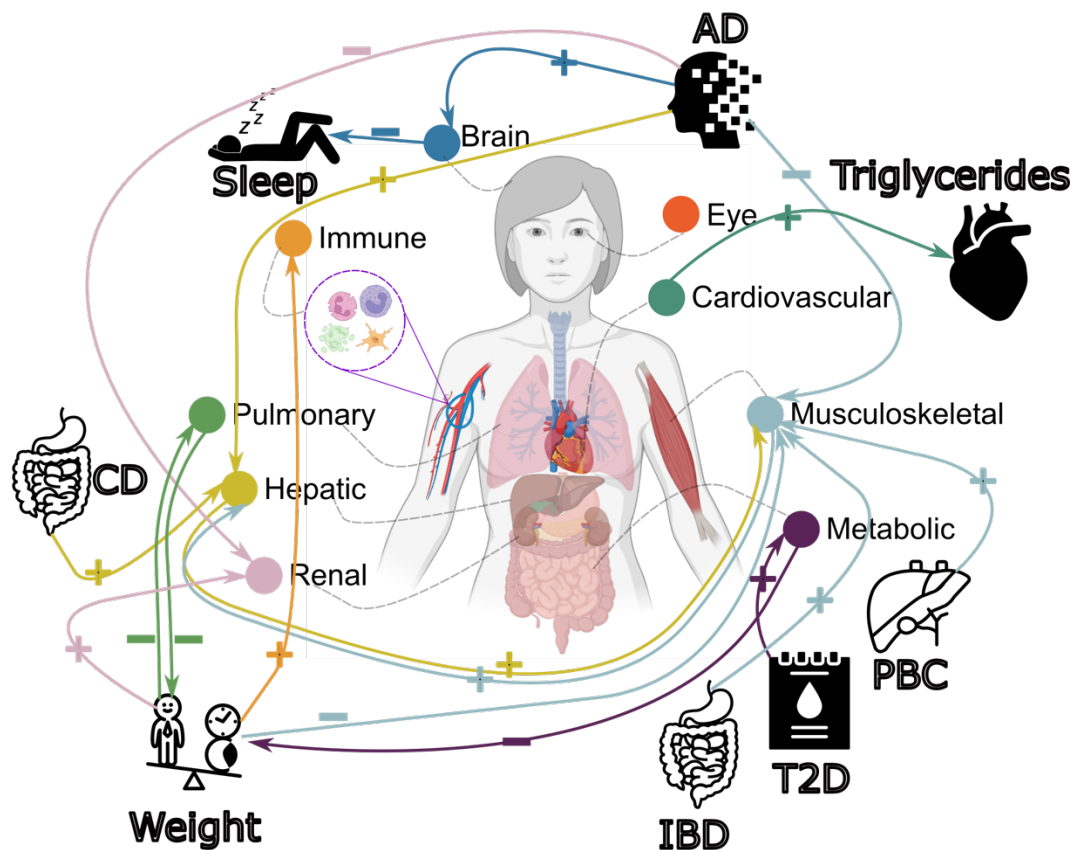

601 We conducted two sets of Mendelian randomization analyses. Firstly, we examined the causal  
602 relationships between each pair of BAGs, excluding overlapping populations. Secondly, we  
603 investigated the causal associations between the 9 BAGs and the 17 unbiasedly selected clinical  
604 traits. Bi-directional analyses, including forward and inverse analyses on the exposure and  
605 outcome variables, were performed in all experiments. Significant tests were adjusted for  
606 multiple comparisons using the Bonferroni correction. Each colored arrow represents a potential  
607 causal effect connecting the exposure variable to the outcome variable. The symbol "+" denotes  
608 an OR larger than 1, while "-" represents an OR smaller than 1. Detailed OR and 95%CI  
609 information can be found in **Supplementary eFigure 38** and **eFile 19-20**. It's crucial to approach  
610 the interpretation of these potential causal relationships with caution despite our thorough efforts  
611 in conducting multiple sensitivity checks to assess any potential violations of underlying  
612 assumptions. Abbreviation: AD: Alzheimer's disease; T2D: type 2 diabetes; PBC: primary  
613 biliary cholangitis; CD: Crohn's disease; IBD: inflammatory bowel disease; CI: confidence  
614 interval; OR: odds ratio.  
615  
616



## 617 Discussion

618 The current study comprehensively depicts the genetic architecture of common genetic variants  
619 on biological aging of nine human organ systems using multimodal data from 377,028 European  
620 ancestry participants. We identified many genomic loci for the BAGs of nine human organ  
621 systems, which exhibited significant associations with a wide range of clinical traits documented  
622 in the GWAS Catalog. These associations were observed within a phenotypic landscape  
623 characterized by BAG-organ specificity and inter-organ connections. The brain BAG showed the  
624 highest SNP-based heritability estimate among all nine organ systems. GSEA, tissue-specific  
625 gene expression patterns, and heritability enrichment results provided additional evidence  
626 supporting biological validation for BAG-organ specificity and inter-organ connections. The  
627 phenotypic correlation between BAGs was a proxy for their genetic correlation, thereby  
628 supporting the long-standing Cheverud's Conjecture. Mendelian randomization demonstrated  
629 potential causal relationships between chronic diseases, particularly AD and type 2 diabetes,  
630 body weight, sleep duration, and the nine BAGs.

631 Our large-scale multi-organ GWAS significantly expands the current catalog of genetic  
632 variants associated with health-related traits. The discovery of these identified genomic loci has  
633 significant clinical implications. These findings provide an invaluable foundation to validate  
634 genes or regulatory elements, molecular pathways, and biological processes related to the clinical  
635 traits and diseases of interest in the current study and future GWAS analyses. Previous GWAS  
636 mainly focused on the BAG in one organ system, such as the brain BAG<sup>54-57</sup> from imaging-  
637 derived phenotypes. These investigations have largely overlooked the inherent  
638 interconnectedness of human organ systems, which are intricately intertwined with distinct axes.  
639 Recent studies have identified notable axes, such as the heart-brain-liver<sup>11</sup>, brain-eye<sup>58</sup>, and  
640 brain-heart<sup>59</sup> axes, highlighting the importance of comprehending these intricate relationships to  
641 understand human physiology and health.

642 Our phenome-wide associations validate the pleiotropic effects of the identified genomic  
643 loci, influencing various health-related clinical traits in the GWAS Catalog. Our findings also  
644 highlight BAG-organ specificity and inter-organ connections, further supporting that biological  
645 aging is a complex, multifaceted phenomenon. The human brain regulates various physiological  
646 processes and maintains homeostasis throughout the body. Consequently, it is unsurprising that  
647 the brain exhibits interconnectedness with clinical traits associated with multiple organ systems.  
648 The remarkable enrichment of metabolic traits across various organ systems is unsurprising. As a  
649 vital metabolic organ, the liver substantially overlaps genetic variants and loci with both the  
650 hepatic and metabolic BAGs. Biologically, the liver's metabolic functions are intricately  
651 regulated by hormones like insulin and other metabolic regulators<sup>12</sup>. Similarly, the interplay  
652 between immune and metabolic processes is essential for maintaining overall health and is  
653 crucial for the body's ability to respond to pathogens and regulate metabolic homeostasis<sup>6</sup>.

654 We highlighted that the brain BAG is the most heritable among the nine organ systems.  
655 Determining the genetic heritability of specific organ systems can be complex as no organ  
656 system functions independently, and many diseases or traits involve complex interactions  
657 between multiple organ systems, as well as genetic and environmental factors. The brain plays a  
658 crucial role in developing and functioning various physiological processes across the body. Its  
659 intricate structure and diverse cell types render it vulnerable to genetic influences<sup>60</sup>. Therefore,  
660 the brain may exhibit higher genetic stability and less environmental variability<sup>61</sup> than other  
661 organs. The human brain's extensive functional connectivity and intricate networks may also  
662 contribute to its higher heritability. These networks facilitate the transmission of genetic



663 information and the propagation of genetic effects across different brain regions<sup>30</sup>. Lastly,  
664 genetic variations shaping the human brain are pleiotropic and influence cognitive abilities,  
665 behavior, and susceptibility to neurological and psychiatric disorders. Collectively, these factors  
666 may contribute to the marked genetic heritability observed in the human brain compared to other  
667 organ systems.

668 Our gene-level and partitioned heritability analyses further validate our GWAS findings,  
669 supporting BAG-organ specificity and inter-organ connections. In GSEA, the genes associated  
670 with the cardiovascular BAG were implicated in the IGF-II pathway. IGF-II activates two  
671 receptors (IGF-1R and IR-A) to promote cell growth and survival. The IGF signaling pathway is  
672 essential for cardiac development in the human heart - the first functional organ to develop<sup>62</sup>. In  
673 particular, IGF-II promotes fetal cardiomyocyte proliferation through the tyrosine kinase  
674 receptors IGF1R and INSR. Previous research provided appealing evidence on IGF signaling in  
675 cardiac regeneration in animal models and induced pluripotent stem cells<sup>63</sup>. The flavonoid  
676 glucuronidation pathway was the most significant enrichment result shown in the hepatic BAG.  
677 A previous study demonstrated that procyanidin C1, a flavonoid in grape seed extract, extended  
678 the lifespan of mice<sup>64</sup>. Furthermore, ample evidence indicated that natural flavonoids could be  
679 potential therapeutic approaches for non-alcoholic fatty liver disease<sup>65</sup>. The metabolites formed  
680 through this pathway can also exert effects beyond the liver and impact other organ systems. Our  
681 tissue-specific gene expression analyses provided additional support for the biological relevance  
682 of our GWAS findings, as the identified genes exhibited specific expression patterns within  
683 tissues from the corresponding organ systems.

684 The heritability enrichment analysis further validates the BAG-organ specificity and  
685 inter-organ connections by highlighting the disproportional heritability enrichment of genetic  
686 variants in different functional categories, cell types, tissues, and chromatin states. The cell type-  
687 specific enrichment results in the brain (i.e., oligodendrocytes) and cardiovascular (i.e., neurons)  
688 BAGs align with previous research. Specifically, Zhao et al. conducted a large-scale GWAS on  
689 brain white matter microstructure and found significant heritability enrichment in glial cells,  
690 particularly oligodendrocytes<sup>31</sup>, which aligns with our current findings. Our previous multimodal  
691 brain BAG GWAS<sup>54</sup> also confirmed this enrichment in the brain BAG derived from the white  
692 matter microstructural features. Similarly, research has revealed the presence of an "intrinsic  
693 cardiac nervous system" within the heart, often called the "heart brain." This system consists of  
694 around 40,000 neurons similar to those found in the brain, indicating that the heart possesses a  
695 distinct nervous system<sup>66</sup>.

696 Our genetic correlation results confirmed that the genetic correlation generally mirrors  
697 phenotypic correlations in multi-organ biological age. This suggests that environmental factors  
698 likely affect the aging of multiple organ systems in the same direction. Providing evidence for  
699 Cheverud's Conjecture can have clinical implications by providing valuable insights into the  
700 genetic basis of complex age-related diseases. For instance, by identifying the shared genetic  
701 factors underlying multiple age-related diseases, we can target these common pathways to  
702 develop novel treatments or repurpose existing drugs<sup>67</sup> that have proven efficacy in one disease  
703 or condition for treating others. Moreover, the validation of Cheverud's Conjecture emphasizes  
704 the importance of considering the genetic covariance of age-related diseases in clinical practice.  
705 It underscores the need for comprehensive genetic assessments and genomic analyses to  
706 understand disease risk and progression<sup>68</sup>.

707 We found a bi-directional causal relationship between the hepatic and musculoskeletal  
708 BAGs. Abundant research has suggested that liver function and metabolic health, particularly

709 related to glucose and lipid metabolism, can significantly impact musculoskeletal health<sup>69</sup>. This  
710 inter-organ connection can cause dysregulation of liver metabolism (e.g., non-alcoholic fatty  
711 liver disease) linked to musculoskeletal disorders, including osteoporosis, sarcopenia, and  
712 muscle wasting. The musculoskeletal system can also exert an inverse influence on liver  
713 function. Regular physical activity and muscle strength have been linked to enhanced liver health  
714 and decreased susceptibility to liver diseases. To further support this, causal effects of primary  
715 biliary cholangitis, a chronic liver disease, on elevated musculoskeletal BAG were confirmed in  
716 our Mendelian randomization results (**Fig. 6**). The absence of direct causal relationships between  
717 the remaining BAGs can be attributed to various factors with potential explanations and  
718 implications. One possible explanation is that the brain BAG, having the smallest sample size in  
719 our GWAS (after removing overlapping participants), may be limited in statistical power. In  
720 addition, this may suggest that various factors, including chronic diseases, environmental  
721 exposures, and lifestyle choices, influence biological aging in alternative pathways or mediate  
722 such changes. Thus, understanding the collective contribution of chronic diseases, environmental  
723 factors, and lifestyle choices is crucial for comprehending the overall aging process and its  
724 impact on organ health.

725 We found that several clinical traits collectively cause organ systems to appear older or  
726 younger than their chronological age. For instance, body weight was causally associated with the  
727 immune, musculoskeletal, metabolic, and pulmonary BAGs. For several reasons, body weight  
728 can causally influence multiple organ systems. Excessive body weight (e.g., obesity) has  
729 metabolic consequences, including increased inflammation, insulin resistance, and dysregulation  
730 of metabolic pathways in adipose tissue<sup>70</sup>. It also leads to mechanical stress on the body,  
731 contributing to musculoskeletal strain<sup>71</sup> and cardiovascular workload<sup>72</sup>. Hormonal imbalances<sup>73</sup>  
732 and lifestyle factors linked to body weight also influence multi-organ function and the  
733 development of chronic diseases. Being overweight is also a risk factor for type 2 diabetes,  
734 which was positively causally associated with metabolic BAG (**Fig. 6**). AD was causally linked  
735 to the brain, hepatic, musculoskeletal, and renal BAGs. AD, a neurodegenerative disorder  
736 primarily affecting the brain, can have causal influences on multiple organ systems. For example,  
737 it has broader systemic involvement beyond the brain, mediated by mechanisms including  
738 protein aggregation (e.g., amyloid- $\beta$  and tau<sup>74</sup>), vascular dysfunction<sup>75</sup>, inflammation<sup>76</sup>, and other  
739 secondary factors. Protein aggregates can spread to other organs; vascular abnormalities can  
740 impact blood flow; inflammation can affect distant organ systems; secondary factors, such as  
741 medication use and lifestyle changes, also contribute.

## 742 743 **Limitations**

744 This study has several limitations. First, the generalizability of genetic findings from European to  
745 non-European ancestry populations is limited. Future studies can extend their scope to  
746 encompass a more diverse array of underrepresented ethnicities, a wider range of disease  
747 cohorts, and individuals of varying ages throughout their entire lifespan. Secondly, it is essential  
748 to approach the causality results cautiously, considering the assumptions underlying Mendelian  
749 randomization. In future studies, more advanced multi-response Mendelian randomization  
750 methods<sup>77</sup> should be utilized. Thirdly, despite our efforts of quality check analyses to scrutinize  
751 our primary GWAS, it's essential to acknowledge that potential ascertainment bias<sup>78</sup> and  
752 confounding related to demographic and socioeconomic factors could potentially introduce  
753 cryptic population stratification, which may not be entirely resolved in the current study. Finally,  
754 the large number of genomic loci identified in our GWAS may have connections to BAGs due to

755 various factors, such as biological processes, potential confounding due to demographics, or  
756 specific study design and phenotyping aspects. It's important to note that the effects at these loci  
757 might not be inherently biological but could be influenced by other unmeasured confounding  
758 factors.

## 759 760 **Outlook**

761 In conclusion, our study presents compelling genetic evidence to support that *no organ system is*  
762 *an island*<sup>1</sup> – the collective influence of various chronic diseases on these multi-organ systems  
763 and the interconnectedness among these human organ systems. These findings highlight the  
764 importance of comprehensively understanding the underlying causes of chronic diseases within  
765 the multi-organ network. By shedding light on its comprehensive genetic architecture, our study  
766 paves the way for future research to unravel complex disease mechanisms and develop holistic  
767 approaches to ameliorate overall organ health.  
768

---

<sup>1</sup> We adapt the concept of "No Man Is An Island" from the poem by John Donne, highlighting the interconnectedness of human organ systems.

## 769 **Methods**

### 770 **Method 1: Support vector machines to predict the chronological age of nine organ systems**

771 Our prior study<sup>3</sup> used support vector machines to predict the chronological age of healthy  
772 individuals – defined as no self-reported and healthcare-documented lifetime chronic medical  
773 conditions – based on phenotypes from the nine organ systems. Support vector machine  
774 regression was preferred over linear regression for its enhanced robustness to outliers and  
775 overfitting. We performed a 20-fold cross-validation procedure and developed predictive models  
776 for each organ system.

777 In each of the 20-fold cross-validation iterations, a linear support vector machine was  
778 employed to predict chronological age. The training set consisted of 19 folds of individuals, and  
779 the fitted regression coefficients (feature weights) were then applied iteratively to the remaining  
780 held-out set (test set) to predict the chronological age of each healthy individual. This approach  
781 ensured that the prediction model was not trained using the same individuals for which it made  
782 predictions, minimizing the risk of overfitting. Before each iteration of model training, all  
783 measures (excluding categorical variables) were standardized using the weighted column mean  
784 and standard deviation computed within the training set. The SVM box constraint and kernel  
785 scale were set to unity, while the half-width of the epsilon-insensitive band was set to a tenth of  
786 the standard deviation of the interquartile range of the predicted variable (chronological age).  
787 The SVM was solved using sequential minimal optimization with a gap tolerance of 0.001. The  
788 mathematical principles of support vector machines are well-established in the field and have  
789 been widely recognized<sup>79</sup>. Further details on this topic can be found in our previous study<sup>3</sup>.

790 The concept of biological age gap derived from artificial intelligence has been widely  
791 investigated, especially the brain age<sup>80,81</sup>. The calculation of the nine BAGs were established in  
792 our previous works<sup>3,14</sup>. We previously showed that the prediction accuracy of biological age was  
793 not influenced by the number of phenotypes, despite variations across different organ systems.  
794 While some prior studies<sup>82</sup> used deep learning for brain BAG and obtained a lower mean  
795 absolute error, we have previously demonstrated that lower mean absolute error might  
796 compromise sensitivity to disease-related information<sup>83</sup>. In our previous GWAS<sup>14</sup>, which  
797 separately examined three multimodal brain BAGs derived from T1-weighted, diffusion, and  
798 resting-state fMRI data, we extensively investigated the influence of various brain imaging  
799 feature types and study designs on the genetic signals. Our results unveiled both the consistency  
800 and distinctions in the genetic foundations across these diverse contexts. Finally, we recognize  
801 that ascertainment bias may be present in our GWAS due to variations in sequencing techniques,  
802 differences between populations (e.g., disease populations vs. healthy controls), and  
803 socioeconomic factors that have not been explicitly modeled in our study.

804

### 805 **Method 2: Study populations**

806 UKBB is a population-based study of approximately 500,000 people recruited between 2006 and  
807 2010 from the United Kingdom. The UKBB study has ethical approval, and the ethics committee  
808 is detailed here: [https://www.ukbiobank.ac.uk/learn-more-about-uk-biobank/governance/ethics-  
809 advisory-committee](https://www.ukbiobank.ac.uk/learn-more-about-uk-biobank/governance/ethics-advisory-committee).

810 The current study analyzed multimodal data, including imaging-derived phenotypes  
811 (IDP) and physical and physiological measures in nine human organ systems from 154,774  
812 UKBB participants. In our previous study, we constructed BAGs for eight organ systems using  
813 machine learning, including MRI data for brain BAG from 30,108 participants (European

814 ancestry), pulse rate and blood pressure data for cardiovascular BAG, liver-related blood  
815 biomarkers for hepatic BAG, C-reactive protein and blood hematology variables for immune  
816 BAG, blood biomarkers for metabolic BAG, physical measurements and vitamin D for  
817 musculoskeletal BAG, lung functioning measurements for pulmonary BAG, and glomerular  
818 filtration and electrolyte regulation biomarkers for renal BAG from 111,543 participants.  
819 Furthermore, the current study also used 60 optical coherence tomography (OCT)-derived  
820 measures from 36,004 participants to derive the BAG of the ninth organ system – the eye BAG.  
821 The inclusion criteria for the features used to predict the eight BAGs, the machine learning  
822 methods, and cross-validation procedures are detailed in our previous study<sup>3</sup>. We initially used  
823 the 88 OCT-derived measures (category ID: 10079) for the additional eye BAG in 67,549  
824 participants. Of these measures, 28 were excluded due to a high missing rate (>20% of  
825 participants). Additionally, 4172 participants were excluded due to missing data, and 1798  
826 participants identified as outliers (outside mean +/- 6SD) for the 60 remaining measures were  
827 discarded. This finally resulted in 41,966 participants (36,004 European ancestry participants).  
828 The included 2444 features to derive the BAG of the nine organ systems are presented in  
829 **Supplementary eFile 21**.

830 In addition, we also performed GWAS for seven variables from 222,254 UKBB  
831 participants by excluding the 154,774 participants from the BAG populations to avoid bias due  
832 to overlapping samples. These variables included six lifestyle factors and one cognitive variable:  
833  $N=219,661$  (European ancestry) for coffee intake (Field ID:1498),  $N=221,393$  for fresh fruit  
834 intake (Field ID:1309),  $N=221,739$  for tea intake (Field ID:1488),  $N=220,765$  for sleep duration  
835 (Field ID:1160),  $N=209,012$  for time spent outdoors in summer (Field ID:1050),  $N=221,337$  for  
836 body weight (Field ID:21002), and  $N=220,624$  for reaction time (Field ID:20023).

837 The current work was jointly performed under application numbers 35148 (i.e., genetic  
838 data) and 60698 (i.e., the generation of the nine BAGs). In total, we analyzed data from 377,028  
839 individuals of European ancestry in the current study.

840

### 841 **Method 3: Genetic analyses**

842 We used the imputed genotype data for all genetic analyses, and our quality check pipeline  
843 resulted in 487,409 participants and 6,477,810 SNPs. After merging with the population for each  
844 BAG, we included 30,108-111,543 European ancestry participants for the nine BAGs (**Fig. 1**).  
845 To avoid bias due to overlapping populations<sup>16</sup>, we also used the rest of the UKBB participants  
846 of European ancestry (non-overlapping) to derive the GWAS summary statistics for several  
847 lifestyle factors (**Method 3j**). We summarize the genetic QC pipeline. First, we excluded related  
848 individuals (up to 2<sup>nd</sup>-degree) from the complete UKBB sample using the KING software for  
849 family relationship inference.<sup>84</sup> We then removed duplicated variants from all 22 autosomal  
850 chromosomes. Individuals whose genetically identified sex did not match their self-  
851 acknowledged sex were removed. Other excluding criteria were: i) individuals with more than  
852 3% of missing genotypes; ii) variants with minor allele frequency (MAF) of less than 1%  
853 (dosage mode<sup>85</sup>); iii) variants with larger than 3% missing genotyping rate; iv) variants that  
854 failed the Hardy-Weinberg test at  $1 \times 10^{-10}$ . To adjust for population stratification,<sup>86</sup> we derived  
855 the first 40 genetic principle components (PC) using the FlashPCA software<sup>87</sup>. Details of the  
856 genetic quality check protocol are described elsewhere<sup>14,46,88</sup>. Details of the genetic quality check  
857 protocol are described elsewhere<sup>29,46</sup>.

858



859 **(a): Genome-wide association analysis:** For GWAS, we ran a linear regression using Plink<sup>89</sup> for  
860 each BAG, controlling for confounders of age, dataset status (training/validation/test or  
861 independent test dataset), age x squared, sex, age x sex interaction, age-squared x sex interaction,  
862 and the first 40 genetic principal components; additional covariates for total intracranial volume  
863 and the brain position in the scanner were included for brain BAG GWAS. We adopted the  
864 genome-wide P-value threshold ( $5 \times 10^{-8}$ ) and annotated independent genetic signals considering  
865 linkage disequilibrium (see below).

866 To check the robustness of our GWAS results, we performed several sensitivity check  
867 analyses, including *i*) sex-stratified GWAS for males and females, *ii*) split-sample GWAS by  
868 randomly dividing the entire population into two splits (sex and age-matched), *iii*) non-European  
869 ancestries GWAS, and *iv*) fastGWA for linear mixed effect GWAS, hypothesizing that the main  
870 GWASs with European ancestry did not show substantial genomic inflation due to cryptic  
871 population stratification. In all our sensitivity check analyses, we considered linkage  
872 disequilibrium. We only evaluated the independent significant SNPs of the two sets of  $\beta$   
873 coefficients between splits, genders, ancestry groups, and GWAS methods. The definition of the  
874 independent significant SNPs used the same parameters as in FUMA (**Supplementary eMethod**  
875 **1**). We used the raw genotype data and the Plink *clump* command (250 kb) and defined a set of  
876 SNPs in linkage disequilibrium with the independent significant SNPs – analogous to the  
877 candidate SNPs in FUMA.

878  
879 **(b): SNP-based heritability:** We estimated the SNP-based heritability ( $h^2$ ) using GCTA<sup>24</sup> with  
880 the same covariates in GWAS. We reported results from two experiments for each BAG using *i*)  
881 the full sample sizes and *ii*) randomly down-sampled sample sizes to that ( $N=30,108$ ) of the brain  
882 BAG with comparable distributions regarding sex and age – the sample size of brain BAGs was  
883 smaller than the other BAGs.

884  
885 **(c): Annotation of genomic loci:** The annotation of genomic loci and mapped genes was  
886 performed via FUMA<sup>90</sup>. For the annotation of genomic loci, FUMA first defined lead SNPs  
887 (correlation  $r^2 \leq 0.1$ , distance  $< 250$  kb) and assigned them to a genomic locus (non-  
888 overlapping); the lead SNP with the lowest P-value (i.e., the top lead SNP) was used to represent  
889 the genomic locus in **Fig. 1**. For gene mappings, three different strategies were considered. First,  
890 positional mapping assigns the SNP to its physically nearby genes (a 10 kb window by default).  
891 Second, eQTL mapping annotates SNPs to genes based on eQTL associations using the GTEx v8  
892 data. Finally, chromatin interaction mapping annotates SNPs to genes when there is a significant  
893 chromatin interaction between the disease-associated regions and nearby or distant genes<sup>90</sup>. The  
894 definition of top lead SNP, lead SNP, independent significant SNP, and candidate SNP can be  
895 found in **Supplementary eMethod 1**.

896 For the top lead SNP of each identified genomic locus, we showcased whether it was  
897 previously associated with any clinical traits considering linkage disequilibrium (5000kb around  
898 the top lead SNP) in the EMBL-EBI GWAS Catalog platform  
899 (<https://www.ebi.ac.uk/gwas/home>). For instance, we aimed to query the locus with the top lead  
900 SNP (rs60569686) associated with the renal BAG. First, we looked up the chromosomal position  
901 (i.e., chromosome 13) and found that the location is chr13:49170160 (GRCh38). We then search  
902 the GWAS Catalog for a 5000kb region around this top lead SNP: “chr13:49167660-49172660”  
903 (<https://www.ebi.ac.uk/gwas/regions/chr13:49167660-49172660>; query date: 12th October  
904 2023). In this region, we discovered no prior associations. It's important to note that this search is

905 not comprehensive, as new GWAS studies continually emerge on various open platforms, such  
906 as IEU OpenGWAS<sup>91</sup> (<https://gwas.mrcieu.ac.uk/>) and GWAS ATLAS<sup>23</sup>  
907 (<https://atlas.ctglab.nl/PheWAS>).

908  
909 **(d): Phenome-wide association look-up queries:** We first queried the significant independent  
910 SNPs within each locus in the EMBL-EBI GWAS Catalog (query date: 24<sup>th</sup> April 2023, via  
911 FUMA version: v1.5.4) to determine their previously identified associations with any other traits  
912 (P-value < 1x10<sup>-5</sup> by default in the EMBL-EBI GWAS Catalog). For visualization purposes, we  
913 further mapped the associated traits into organ-specific groups and other chronic disease traits  
914 and cognition. We performed the following procedure to fully consider LD and remove  
915 redundant associations among the independent significant SNPs. If the top lead SNP showed any  
916 clinical associations, this would present the current locus; if not, we queried the independent  
917 significant SNPs (in high correlation with the top lead SNP), starting with the most significant  
918 SNPs, until we identified established associations. In this way, only one genetic variant within  
919 each genomic locus was considered. We also conducted a complementary phenome-wide  
920 association query on the GWAS Atlas platform. We applied the same P-value threshold search  
921 criteria as those used in the EMBL-EBI GWAS Catalog. The same procedure, considering  
922 linkage disequilibrium and redundant associations, was applied. These exemplary findings are  
923 presented as a supplementary search to complement the results shown in **Fig. 2a**, and are  
924 available in **Supplementary eText 2**.

925  
926 **(e): Gene set enrichment analysis:** We first performed gene-level association analysis using  
927 MAGMA<sup>33</sup>. First, gene annotation was performed to map the SNPs (reference variant location  
928 from Phase 3 of 1,000 Genomes for European ancestry) to genes according to their physical  
929 positions. Of note, other advanced annotation methods exist that integrate functional insights,  
930 such as brain chromatin interaction<sup>92</sup> and cell-type-specific gene expression<sup>93</sup>. We then  
931 performed gene-level associations based on the SNP GWAS summary statistics to obtain gene-  
932 level p-values between the nine BAGs and the curated protein-encoding genes containing valid  
933 SNPs. We performed GSEA using the gene-level association p-values. Gene sets were obtained  
934 from the Molecular Signatures Database (MsigDB, v7.5.1)<sup>94</sup>, including 6366 curated and 10,402  
935 ontology gene sets. All other parameters were set by default for MAGMA. The Bonferroni  
936 method was used to correct multiple comparisons for all tested gene sets.

937  
938 **(f): Tissue-specific gene expression analysis:** MAGMA performed gene-property analyses to  
939 identify tissue-specific gene expression of the nine BAGs. The gene-property analysis converts  
940 the gene-level association P-values (above) to Z scores and tests a specific tissue's gene  
941 expression value versus the average expression value across all tissues in a regression model.  
942 Bonferroni correction was performed for all tested gene sets. We reported the results from the 54  
943 tissue types using the GTEx V8 data.

944  
945 **(g): Gene-drug-disease network:** We tested the enrichment of the nine BAG-linked genes in the  
946 targeted gene sets for different drug categories from the DrugBank database<sup>38</sup>. The gene-drug-  
947 disease network was constructed to prioritize potentially repositionable drugs. The GREP  
948 software<sup>37</sup> performs Fisher's exact tests to examine whether the prioritized genes are enriched in  
949 gene sets targeted by drugs in a clinical indication category for a certain disease or condition.  
950 Bonferroni correction was performed for all tested drugs.

951  
952 **(h): Genetic correlation:** We used the LDSC<sup>17</sup> software to estimate the pairwise genetic  
953 correlation ( $g_c$ ) between each pair of BAGs, as well as between the nine BAG and 41 other  
954 clinical traits, including chronic diseases involving multiple organ systems, such as AD for brain  
955 and chronic kidney disease for kidney, cognition, and lifestyle factors. We used the precomputed  
956 LD scores from the 1000 Genomes of European ancestry. To ensure the suitability of the GWAS  
957 summary statistics, we first checked that the selected study's population was European ancestry;  
958 we then guaranteed a moderate SNP-based heritability  $h^2$  estimate. Notably, LDSC corrects for  
959 sample overlap and provides an unbiased estimate of genetic correlation<sup>68</sup>. The inclusion criteria  
960 and finally included traits are detailed in **Supplementary eTable 3**. Bonferroni correction was  
961 performed for the 41 clinical traits.

962  
963 **(i): Partitioned heritability estimate:** Our objective is to comprehend how distinct functional  
964 genome categories play varying roles in contributing to the heritability of the nine BAGs.  
965 Therefore, the partitioned heritability analysis via stratified LD score regression calculates the  
966 extent to which heritability enrichment can be attributed to predefined and annotated genome  
967 regions and categories<sup>40</sup>. Three sets of functional categories and cell and tissue-specific types  
968 were considered. First, the partitioned heritability was calculated for 53 general functional  
969 categories (one including the entire set of SNPs). The 53 functional categories are not specific to  
970 any cell type and include coding, UTR, promoter and intronic regions, etc. The details of the 53  
971 categories are described elsewhere<sup>40</sup>. Subsequently, cell and tissue type-specific partitioned  
972 heritability was estimated using gene sets from Cahoy et al.<sup>41</sup> for three main cell types (i.e.,  
973 astrocyte, neuron, and oligodendrocyte), multi-tissue chromatin states-specific data  
974 (ROADMAP<sup>42</sup> and ENTEX<sup>43</sup>), and multi-tissue gene expression data (GTEx V8<sup>36</sup>). Bonferroni  
975 correction was performed for all tested annotations and categories. The detailed methodologies  
976 for the stratified LD score regression are presented in the original work<sup>40</sup>. The LD scores and  
977 allele frequencies for the European ancestry were obtained from a predefined version based on  
978 data from the 1000 Genomes project.

979  
980 **(j): Two-sample bi-directional Mendelian randomization:** We investigated whether one BAG  
981 was causally associated with another BAG and whether the 41 clinical traits were causally  
982 associated with the nine BAGs (**Fig. 5**). To this end, we employed a bidirectional, two-sample  
983 Mendelian randomization using the TwoSampleMR package<sup>95</sup>. Both the forward and inverse  
984 Mendelian randomization were performed between each pair of traits by switching the exposure  
985 and outcome variables. We applied five different Mendelian randomization methods and  
986 reported the results of inverse variance weighted (IVW) in the main text and the four others (i.e.,  
987 Egger, weighted median, simple mode, and weighted mode estimators) in the supplement.

988 Mendelian randomization needs to fulfill several instrumental variable assumptions<sup>96</sup>,  
989 including:

- 990
- 991 • the genotype is associated with the exposure
  - 992 • the genotype is associated with the outcome through the studied exposure only (exclusion  
993 restriction assumption)
  - 994 • the genotype is independent of other factors that affect the outcome (independence  
995 assumption<sup>97</sup>)

996 We followed a systematic procedure guided by the STROBE-MR Statement<sup>98</sup> in all steps  
of our causality analyses, including selecting exposure and outcome variables, reporting

997 comprehensive statistics, performing sensitivity checks for potential violations of underlying  
998 assumptions, and performing the analyses using alternative methods and software<sup>53,77</sup>. For the  
999 causal inference of each pair of BAGs, all GWAS summary statistics were derived from our  
1000 analyses by excluding overlapping populations of the two BAGs. For example, to test the causal  
1001 relationship between the brain BAG and cardiovascular BAG, we reran GWAS for the  
1002 cardiovascular BAG by excluding the partially overlapping population from the brain BAG. For  
1003 all the seven body organ systems that had entirely overlapping populations, we used the GWAS  
1004 data from the split-sample analyses (**Method 3a**). For instance, the GWAS for the cardiovascular  
1005 BAG was from the first-split data, and the pulmonary BAG was from the second-split data.  
1006 Bonferroni correction was performed for the tested BAGs.

1007 One key challenge in our hypothesis-driven Mendelian randomization is to select these  
1008 exposure variables unbiasedly. Clinical traits sharing common genetic covariance with nine  
1009 BAGs are more likely to be causally associated with them. We performed a systematic inclusion  
1010 procedure using the following criteria to overcome this. We manually queried the 41 clinical  
1011 traits – used in our genetic correlation analyses – in the IEU GWAS database, specifically  
1012 curated for Mendelian randomization analyses. We ranked all available studies for a certain trait  
1013 (e.g., AD) based on the sample sizes. We then chose the study whose populations were of  
1014 European ancestry and did not include UKBB participants to avoid bias due to overlapping  
1015 populations<sup>16</sup>. For the traits whose GWAS data were available in the IEU GWAS database, we  
1016 used the TwoSampleMR package to perform the Mendelian randomization analysis. For the  
1017 traits whose data were not appropriate in the IEU GWAS database, we then performed another  
1018 manual query in the EMBL-EBI GWAS Catalog database to download the available GWAS  
1019 summary statistics with the same filter criteria. For the traits whose GWAS data were dominated  
1020 by studies using UKBB participants in both databases, we ran GWAS using our own UKBB data  
1021 by excluding overlapping populations. Finally, after harmonizing their GWAS summary  
1022 statistics (using the function *harmonise\_data* from 2SampleMR), this resulted in 17 clinical traits  
1023 with at least eight valid IVs (i.e., SNPs). The 17 clinical traits included chronic diseases affecting  
1024 multiple organ systems, cognition, and lifestyle factors (**Supplementary eTable 7**). Bonferroni  
1025 correction was performed for all tested clinical traits.

1026 We performed several sensitivity analyses. First, a heterogeneity test was performed to  
1027 check for violating the IV assumptions. Horizontal pleiotropy was estimated to navigate the  
1028 violation of the IV's exclusivity assumption<sup>99</sup> using a funnel plot, single-SNP Mendelian  
1029 randomization approaches, and Mendelian randomization Egger estimator<sup>100</sup>. Moreover, the  
1030 leave-one-out analysis excluded one instrument (SNP) at a time and assessed the sensitivity of  
1031 the results to individual SNP.

1032 Following these analyses, we performed three supplementary sensitivity checks for some  
1033 specific significant causal signals: *i*) The exclusion of two common SNPs/IVs (rs429358 and  
1034 rs7412) in the *APOE* gene, considering their potential pleiotropic effects for the hepatic BAG on  
1035 musculoskeletal BAG; *ii*) Incorporating body weight as a covariate in the GWAS for the bi-  
1036 directional causality between the hepatic BAG and musculoskeletal BAG, as body weight  
1037 displayed causal associations with BAGs in multiple organ systems; *iii*) Re-executing the  
1038 Mendelian randomization analysis using alternative software. Specifically, we scrutinized the  
1039 causal relationship between the hepatic BAG and musculoskeletal BAG using the latent causal  
1040 variance (LCV) model<sup>53</sup>. Employing different modeling assumptions and instrumental variables  
1041 in contrast to Mendelian randomization, it examined the causal relationship between two  
1042 interchangeable traits without distinction between the direct and inverse directions. A latent

1043 causal variable (L) acted as a mediator for the genetic correlation between the two traits,  
1044 allowing us to quantify the genetic causality proportion (GCP). A positive GCP value between 0  
1045 and 1 indicates that trait 1 is partially genetically causal; a negative GCP value means trait 2 is  
1046 partially genetically causal.

1047  
1048 **(h): Bayesian colocalization:** The R package (*coloc*) was employed to investigate the genetic  
1049 colocalization signals between two traits at each genomic locus defined by the pulmonary BAG  
1050 GWAS. We employed the Fully Bayesian colocalization analysis using Bayes Factors  
1051 (*coloc.abf*). The method tests five hypotheses, denoted by their posterior probabilities: H0 (no  
1052 association with either trait), H1 (association with trait 1 but not trait 2), H2 (association with  
1053 trait 2 but not trait 1), H3 (association with both traits but with separate causal variants), and H4  
1054 (association with both traits with a shared causal variant). It examines the posterior probability  
1055 (PP.H4.ABF: Approximate Bayes Factor) to evaluate hypothesis *H4*, which suggests the  
1056 presence of a single shared causal variant associated with both traits within a specific genomic  
1057 locus. To determine the significance of the *H4* hypothesis, we set a threshold of  
1058  $PP.H4.ABF > 0.8^{20}$  and at least 100 SNPs were included within the genomic locus. All other  
1059 parameters (e.g., the prior probability of  $p_{12}$ ) were set as default.

1060



1061 **Data Availability**

1062 The GWAS summary statistics corresponding to this study are publicly available on the  
1063 MEDICINE knowledge portal (<https://labs-laboratory.com/medicine>).

## 1064 **Code Availability**

1065 The software and resources used in this study are all publicly available:

- 1066 • MEDICINE: <https://labs-laboratory.com/medicine>, knowledge portal for dissemination
- 1067 • BioAge: <https://github.com/yetianmed/BioAge>, biological age prediction
- 1068 • PLINK: <https://www.cog-genomics.org/plink/>, linear model GWAS
- 1069 • FUMA: <https://fuma.ctglab.nl/>, gene mapping, genomic locus annotation
- 1070 • GCTA: <https://yanglab.westlake.edu.cn/software/gcta/#Overview>, heritability estimates,  
1071 mixed effect GWAS
- 1072 • LDSC: <https://github.com/bulik/ldsc>, genetic correlation, and partitioned heritability
- 1073 • TwoSampleMR: <https://mrcieu.github.io/TwoSampleMR/index.html>, Mendelian  
1074 randomization
- 1075 • Coloc: <https://github.com/chr1swallace/coloc>, Bayesian colocalization
- 1076 • LCV: <https://github.com/lukejconnor/LCV>, Latent causal variable for causal inference

1077 **Competing Interests**

1078 None

1079

1080 **Authors' contributions**

1081 Dr. Wen has full access to all the data in the study and takes responsibility for the integrity of the  
1082 data and the accuracy of the data analysis.

1083 *Study concept and design:* Wen

1084 *Acquisition, analysis, or interpretation of data:* Wen, Tian, Zalesky, Davatzikos

1085 *Drafting of the manuscript:* Wen, Tian, Zalesky, Davatzikos

1086 *Critical revision of the manuscript for important intellectual content:* all authors

1087 *Statistical analysis:* Wen

1088 *BAG index generation:* Tian

## 1089 **References**

- 1090 1. Cheverud, J. M. A COMPARISON OF GENETIC AND PHENOTYPIC  
1091 CORRELATIONS. *Evolution* **42**, 958–968 (1988).
- 1092 2. Melzer, D., Pilling, L. C. & Ferrucci, L. The genetics of human ageing. *Nat Rev Genet* **21**,  
1093 88–101 (2020).
- 1094 3. Tian, Y. E. *et al.* Heterogeneous aging across multiple organ systems and prediction of  
1095 chronic disease and mortality. *Nat Med* 1–11 (2023) doi:10.1038/s41591-023-02296-6.
- 1096 4. Cohen, A. A. *et al.* A complex systems approach to aging biology. *Nat Aging* **2**, 580–591  
1097 (2022).
- 1098 5. Hodson, R. Precision medicine. *Nature* **537**, S49–S49 (2016).
- 1099 6. Hotamisligil, G. S. Inflammation and metabolic disorders. *Nature* **444**, 860–867 (2006).
- 1100 7. Wen, J. *et al.* Genetic, clinical underpinnings of subtle early brain change along  
1101 Alzheimer’s dimensions. 2022.09.16.508329 Preprint at  
1102 <https://doi.org/10.1101/2022.09.16.508329> (2022).
- 1103 8. Liu, Y. *et al.* Genetic architecture of 11 organ traits derived from abdominal MRI using  
1104 deep learning. *eLife* **10**, e65554 (2021).
- 1105 9. Priest, C. & Tontonoz, P. Inter-organ cross-talk in metabolic syndrome. *Nat Metab* **1**,  
1106 1177–1188 (2019).
- 1107 10. Jung, J., Zeng, H. & Horng, T. Metabolism as a guiding force for immunity. *Nat Cell Biol*  
1108 **21**, 85–93 (2019).
- 1109 11. McCracken, C. *et al.* Multi-organ imaging demonstrates the heart-brain-liver axis in UK  
1110 Biobank participants. *Nat Commun* **13**, 7839 (2022).



- 1111 12. Parlakgöl, G. *et al.* Regulation of liver subcellular architecture controls metabolic  
1112 homeostasis. *Nature* **603**, 736–742 (2022).
- 1113 13. Nie, C. *et al.* Distinct biological ages of organs and systems identified from a multi-omics  
1114 study. *Cell Reports* **38**, 110459 (2022).
- 1115 14. Wen, J. *et al.* The Genetic Heterogeneity of Multimodal Human Brain Age. *bioRxiv*  
1116 2023.04.13.536818 (2023) doi:10.1101/2023.04.13.536818.
- 1117 15. Bycroft, C. *et al.* The UK Biobank resource with deep phenotyping and genomic data.  
1118 *Nature* **562**, 203–209 (2018).
- 1119 16. Sanderson, E. *et al.* Mendelian randomization. *Nat Rev Methods Primers* **2**, 1–21 (2022).
- 1120 17. Bulik-Sullivan, B. K. *et al.* LD Score regression distinguishes confounding from  
1121 polygenicity in genome-wide association studies. *Nat Genet* **47**, 291–295 (2015).
- 1122 18. Jiang, L. *et al.* A resource-efficient tool for mixed model association analysis of large-scale  
1123 data. *Nat Genet* **51**, 1749–1755 (2019).
- 1124 19. Klein, S. L. & Flanagan, K. L. Sex differences in immune responses. *Nat Rev Immunol* **16**,  
1125 626–638 (2016).
- 1126 20. Giambartolomei, C. *et al.* Bayesian Test for Colocalisation between Pairs of Genetic  
1127 Association Studies Using Summary Statistics. *PLOS Genetics* **10**, e1004383 (2014).
- 1128 21. Mummery, C. J. *et al.* Tau-targeting antisense oligonucleotide MAPTRx in mild  
1129 Alzheimer’s disease: a phase 1b, randomized, placebo-controlled trial. *Nat Med* 1–11  
1130 (2023) doi:10.1038/s41591-023-02326-3.
- 1131 22. Buniello, A. *et al.* The NHGRI-EBI GWAS Catalog of published genome-wide association  
1132 studies, targeted arrays and summary statistics 2019. *Nucleic Acids Res* **47**, D1005–D1012  
1133 (2019).

- 1134 23. Watanabe, K. *et al.* A global overview of pleiotropy and genetic architecture in complex  
1135 traits. *Nat Genet* **51**, 1339–1348 (2019).
- 1136 24. Yang, J., Lee, S. H., Goddard, M. E. & Visscher, P. M. GCTA: A Tool for Genome-wide  
1137 Complex Trait Analysis. *Am J Hum Genet* **88**, 76–82 (2011).
- 1138 25. Speed, D., Holmes, J. & Balding, D. J. Evaluating and improving heritability models using  
1139 summary statistics. *Nat Genet* **52**, 458–462 (2020).
- 1140 26. Evans, L. M. *et al.* Comparison of methods that use whole genome data to estimate the  
1141 heritability and genetic architecture of complex traits. *Nat Genet* **50**, 737–745 (2018).
- 1142 27. Park, J.-H. *et al.* Distribution of allele frequencies and effect sizes and their  
1143 interrelationships for common genetic susceptibility variants. *Proc Natl Acad Sci U S A*  
1144 **108**, 18026–18031 (2011).
- 1145 28. Corte, L., Liou, L., O’Reilly, P. F. & García-González, J. Trumpet plots: visualizing the  
1146 relationship between allele frequency and effect size in genetic association studies.  
1147 *GigaByte* **2023**, gigabyte89 (2023).
- 1148 29. Wen, J. *et al.* Genomic loci influence patterns of structural covariance in the human brain.  
1149 *Proceedings of the National Academy of Sciences* **120**, e2300842120 (2023).
- 1150 30. Zhao, B. *et al.* Common variants contribute to intrinsic human brain functional networks.  
1151 *Nat Genet* **54**, 508–517 (2022).
- 1152 31. Zhao, B. *et al.* Common genetic variation influencing human white matter microstructure.  
1153 *Science* **372**, (2021).
- 1154 32. Zhao, B. *et al.* Genome-wide association analysis of 19,629 individuals identifies variants  
1155 influencing regional brain volumes and refines their genetic co-architecture with cognitive  
1156 and mental health traits. *Nat Genet* **51**, 1637–1644 (2019).

- 1157 33. Leeuw, C. A. de, Mooij, J. M., Heskes, T. & Posthuma, D. MAGMA: Generalized Gene-  
1158 Set Analysis of GWAS Data. *PLOS Computational Biology* **11**, e1004219 (2015).
- 1159 34. Nikolsky, Y. *et al.* Genome-wide functional synergy between amplified and mutated genes  
1160 in human breast cancer. *Cancer Res* **68**, 9532–9540 (2008).
- 1161 35. Wang, T. *et al.* Genome-wide DNA methylation analysis of pulmonary function in middle  
1162 and old-aged Chinese monozygotic twins. *Respir Res* **22**, 300 (2021).
- 1163 36. The Genotype-Tissue Expression (GTEx) project. *Nat Genet* **45**, 580–585 (2013).
- 1164 37. Sakaue, S. & Okada, Y. GREP: genome for REPositioning drugs. *Bioinformatics* **35**, 3821–  
1165 3823 (2019).
- 1166 38. Wishart, D. S. *et al.* DrugBank 5.0: a major update to the DrugBank database for 2018.  
1167 *Nucleic Acids Res* **46**, D1074–D1082 (2018).
- 1168 39. Mittermayer, F. *et al.* Addressing Unmet Medical Needs in Type 2 Diabetes: A Narrative  
1169 Review of Drugs under Development. *Curr Diabetes Rev* **11**, 17–31 (2015).
- 1170 40. Finucane, H. K. *et al.* Partitioning heritability by functional annotation using genome-wide  
1171 association summary statistics. *Nat Genet* **47**, 1228–1235 (2015).
- 1172 41. Cahoy, J. D. *et al.* A Transcriptome Database for Astrocytes, Neurons, and  
1173 Oligodendrocytes: A New Resource for Understanding Brain Development and Function. *J.*  
1174 *Neurosci.* **28**, 264–278 (2008).
- 1175 42. Bernstein, B. E. *et al.* The NIH Roadmap Epigenomics Mapping Consortium. *Nat*  
1176 *Biotechnol* **28**, 1045–1048 (2010).
- 1177 43. Dunham, I. *et al.* An integrated encyclopedia of DNA elements in the human genome.  
1178 *Nature* **489**, 57–74 (2012).

- 1179 44. Regitz-Zagrosek, V. & Gebhard, C. Gender medicine: effects of sex and gender on  
1180 cardiovascular disease manifestation and outcomes. *Nat Rev Cardiol* **20**, 236–247 (2023).
- 1181 45. Hwang, G. *et al.* Assessment of Neuroanatomical Endophenotypes of Autism Spectrum  
1182 Disorder and Association With Characteristics of Individuals With Schizophrenia and the  
1183 General Population. *JAMA Psychiatry* (2023) doi:10.1001/jamapsychiatry.2023.0409.
- 1184 46. Wen, J. *et al.* Characterizing Heterogeneity in Neuroimaging, Cognition, Clinical  
1185 Symptoms, and Genetics Among Patients With Late-Life Depression. *JAMA Psychiatry*  
1186 (2022) doi:10.1001/jamapsychiatry.2022.0020.
- 1187 47. Yang, Z. *et al.* A deep learning framework identifies dimensional representations of  
1188 Alzheimer’s Disease from brain structure. *Nat Commun* **12**, 7065 (2021).
- 1189 48. Chand, G. B. *et al.* Schizophrenia Imaging Signatures and Their Associations With  
1190 Cognition, Psychopathology, and Genetics in the General Population. *Am J Psychiatry* **179**,  
1191 650–660 (2022).
- 1192 49. Deelen, J. *et al.* A meta-analysis of genome-wide association studies identifies multiple  
1193 longevity genes. *Nat Commun* **10**, 3669 (2019).
- 1194 50. Hill, W. D. *et al.* Genome-wide analysis identifies molecular systems and 149 genetic loci  
1195 associated with income. *Nat Commun* **10**, 5741 (2019).
- 1196 51. Codd, V. *et al.* Polygenic basis and biomedical consequences of telomere length variation.  
1197 *Nat Genet* **53**, 1425–1433 (2021).
- 1198 52. Gusev, A. *et al.* Partitioning Heritability of Regulatory and Cell-Type-Specific Variants  
1199 across 11 Common Diseases. *The American Journal of Human Genetics* **95**, 535–552  
1200 (2014).

- 1201 53. O'Connor, L. J. & Price, A. L. Distinguishing genetic correlation from causation across 52  
1202 diseases and complex traits. *Nat Genet* **50**, 1728–1734 (2018).
- 1203 54. Wen, J. *et al.* The Genetic Heterogeneity of Multimodal Human Brain Age.  
1204 2023.04.13.536818 Preprint at <https://doi.org/10.1101/2023.04.13.536818> (2023).
- 1205 55. Ning, K. *et al.* Improving brain age estimates with deep learning leads to identification of  
1206 novel genetic factors associated with brain aging. *Neurobiology of Aging* **105**, 199–204  
1207 (2021).
- 1208 56. Jonsson, B. A. *et al.* Brain age prediction using deep learning uncovers associated sequence  
1209 variants. *Nat Commun* **10**, 5409 (2019).
- 1210 57. Smith, S. M. *et al.* Brain aging comprises many modes of structural and functional change  
1211 with distinct genetic and biophysical associations. *eLife* **9**, e52677.
- 1212 58. London, A., Benhar, I. & Schwartz, M. The retina as a window to the brain—from eye  
1213 research to CNS disorders. *Nat Rev Neurol* **9**, 44–53 (2013).
- 1214 59. Zhao, B. *et al.* Heart-brain connections: Phenotypic and genetic insights from magnetic  
1215 resonance images. *Science* **380**, abn6598 (2023).
- 1216 60. Zatorre, R. J., Fields, R. D. & Johansen-Berg, H. Plasticity in gray and white: neuroimaging  
1217 changes in brain structure during learning. *Nat Neurosci* **15**, 528–536 (2012).
- 1218 61. Tooley, U. A., Bassett, D. S. & Mackey, A. P. Environmental influences on the pace of  
1219 brain development. *Nat Rev Neurosci* **22**, 372–384 (2021).
- 1220 62. Díaz Del Moral, S., Benaouicha, M., Muñoz-Chápuli, R. & Carmona, R. The Insulin-like  
1221 Growth Factor Signalling Pathway in Cardiac Development and Regeneration. *Int J Mol Sci*  
1222 **23**, 234 (2021).



- 1223 63. Shen, H. *et al.* Mononuclear diploid cardiomyocytes support neonatal mouse heart  
1224 regeneration in response to paracrine IGF2 signaling. *Elife* **9**, e53071 (2020).
- 1225 64. Xu, Q. *et al.* The flavonoid procyanidin C1 has senotherapeutic activity and increases  
1226 lifespan in mice. *Nat Metab* **3**, 1706–1726 (2021).
- 1227 65. Tan, P., Jin, L., Qin, X. & He, B. Natural flavonoids: Potential therapeutic strategies for  
1228 non-alcoholic fatty liver disease. *Front Pharmacol* **13**, 1005312 (2022).
- 1229 66. Litviňuková, M. *et al.* Cells of the adult human heart. *Nature* **588**, 466–472 (2020).
- 1230 67. Ballard, C. *et al.* Drug repositioning and repurposing for Alzheimer disease. *Nat Rev*  
1231 *Neurol* **16**, 661–673 (2020).
- 1232 68. Bulik-Sullivan, B. *et al.* An atlas of genetic correlations across human diseases and traits.  
1233 *Nat Genet* **47**, 1236–1241 (2015).
- 1234 69. Okun, J. G. *et al.* Liver alanine catabolism promotes skeletal muscle atrophy and  
1235 hyperglycaemia in type 2 diabetes. *Nat Metab* **3**, 394–409 (2021).
- 1236 70. Barsh, G. S., Farooqi, I. S. & O’Rahilly, S. Genetics of body-weight regulation. *Nature*  
1237 **404**, 644–651 (2000).
- 1238 71. Anandacoomarasamy, A., Caterson, I., Sambrook, P., Fransen, M. & March, L. The impact  
1239 of obesity on the musculoskeletal system. *Int J Obes* **32**, 211–222 (2008).
- 1240 72. Van Gaal, L. F., Mertens, I. L. & De Block, C. E. Mechanisms linking obesity with  
1241 cardiovascular disease. *Nature* **444**, 875–880 (2006).
- 1242 73. Stanikova, D. *et al.* Testosterone imbalance may link depression and increased body weight  
1243 in premenopausal women. *Transl Psychiatry* **9**, 1–12 (2019).
- 1244 74. Fyfe, I. Influence of amyloid- $\beta$  on tau spread in Alzheimer disease explained. *Nat Rev*  
1245 *Neurol* **18**, 318–318 (2022).

- 1246 75. Barisano, G. *et al.* Blood–brain barrier link to human cognitive impairment and  
1247 Alzheimer’s disease. *Nat Cardiovasc Res* **1**, 108–115 (2022).
- 1248 76. Wyss-Coray, T. Inflammation in Alzheimer disease: driving force, bystander or beneficial  
1249 response? *Nat Med* **12**, 1005–1015 (2006).
- 1250 77. Zuber, V. *et al.* Multi-response Mendelian randomization: Identification of shared and  
1251 distinct exposures for multimorbidity and multiple related disease outcomes. *Am J Hum*  
1252 *Genet* **110**, 1177–1199 (2023).
- 1253 78. Xue, A. *et al.* Genome-wide analyses of behavioural traits are subject to bias by misreports  
1254 and longitudinal changes. *Nat Commun* **12**, 20211 (2021).
- 1255 79. Chang, C.-C. & Lin, C.-J. LIBSVM: A library for support vector machines. *ACM Trans.*  
1256 *Intell. Syst. Technol.* **2**, 1–27 (2011).
- 1257 80. Cole, J. H., Marioni, R. E., Harris, S. E. & Deary, I. J. Brain age and other bodily ‘ages’:  
1258 implications for neuropsychiatry. *Mol Psychiatry* **24**, 266–281 (2019).
- 1259 81. Jones, D. T., Lee, J. & Topol, E. J. Digitising brain age. *The Lancet* **400**, 988 (2022).
- 1260 82. Peng, H., Gong, W., Beckmann, C. F., Vedaldi, A. & Smith, S. M. Accurate brain age  
1261 prediction with lightweight deep neural networks. *Medical Image Analysis* **68**, 101871  
1262 (2021).
- 1263 83. Bashyam, V. M. *et al.* MRI signatures of brain age and disease over the lifespan based on a  
1264 deep brain network and 14 468 individuals worldwide. *Brain* **143**, 2312–2324 (2020).
- 1265 84. Manichaikul, A. *et al.* Robust relationship inference in genome-wide association studies.  
1266 *Bioinformatics* **26**, 2867–2873 (2010).
- 1267 85. Zheng, J., Li, Y., Abecasis, G. R. & Scheet, P. A comparison of approaches to account for  
1268 uncertainty in analysis of imputed genotypes. *Genet Epidemiol* **35**, 102–110 (2011).

- 1269 86. Price, A. L., Zaitlen, N. A., Reich, D. & Patterson, N. New approaches to population  
1270 stratification in genome-wide association studies. *Nat Rev Genet* **11**, 459–463 (2010).
- 1271 87. Abraham, G., Qiu, Y. & Inouye, M. FlashPCA2: principal component analysis of Biobank-  
1272 scale genotype datasets. *Bioinformatics* **33**, 2776–2778 (2017).
- 1273 88. Wen, J. *et al.* The Genetic Architecture of Biological Age in Nine Human Organ Systems.  
1274 *medRxiv* 2023.06.08.23291168 (2023) doi:10.1101/2023.06.08.23291168.
- 1275 89. Purcell, S. *et al.* PLINK: A Tool Set for Whole-Genome Association and Population-Based  
1276 Linkage Analyses. *Am J Hum Genet* **81**, 559–575 (2007).
- 1277 90. Watanabe, K., Taskesen, E., van Bochoven, A. & Posthuma, D. Functional mapping and  
1278 annotation of genetic associations with FUMA. *Nat Commun* **8**, 1826 (2017).
- 1279 91. Elsworth, B. *et al.* The MRC IEU OpenGWAS data infrastructure. 2020.08.10.244293  
1280 Preprint at <https://doi.org/10.1101/2020.08.10.244293> (2020).
- 1281 92. Sey, N. Y. A. *et al.* A computational tool (H-MAGMA) for improved prediction of brain-  
1282 disorder risk genes by incorporating brain chromatin interaction profiles. *Nat Neurosci* **23**,  
1283 583–593 (2020).
- 1284 93. Weeks, E. M. *et al.* Leveraging polygenic enrichments of gene features to predict genes  
1285 underlying complex traits and diseases. *Nat Genet* **55**, 1267–1276 (2023).
- 1286 94. Subramanian, A. *et al.* Gene set enrichment analysis: A knowledge-based approach for  
1287 interpreting genome-wide expression profiles. *Proceedings of the National Academy of*  
1288 *Sciences* **102**, 15545–15550 (2005).
- 1289 95. Hemani, G. *et al.* The MR-Base platform supports systematic causal inference across the  
1290 human phenome. *eLife* **7**, e34408 (2018).

- 1291 96. Burgess, S. *et al.* Guidelines for performing Mendelian randomization investigations:  
1292 update for summer 2023. *Wellcome Open Res* **4**, 186 (2019).
- 1293 97. de Leeuw, C., Savage, J., Bucur, I. G., Heskes, T. & Posthuma, D. Understanding the  
1294 assumptions underlying Mendelian randomization. *Eur J Hum Genet* **30**, 653–660 (2022).
- 1295 98. Skrivankova, V. W. *et al.* Strengthening the Reporting of Observational Studies in  
1296 Epidemiology Using Mendelian Randomization: The STROBE-MR Statement. *JAMA* **326**,  
1297 1614–1621 (2021).
- 1298 99. Bowden, J. *et al.* A framework for the investigation of pleiotropy in two-sample summary  
1299 data Mendelian randomization. *Stat Med* **36**, 1783–1802 (2017).
- 1300 100. Bowden, J., Davey Smith, G. & Burgess, S. Mendelian randomization with invalid  
1301 instruments: effect estimation and bias detection through Egger regression. *Int J Epidemiol*  
1302 **44**, 512–525 (2015).
- 1303
- 1304

## 1305 **Acknowledgments**

1306 The primary funding support for this present study is from the initial funding package provided  
1307 by the University of Southern California for WJ. We want to express our sincere gratitude to the  
1308 UK Biobank team for their invaluable contribution to advancing clinical research in our field.  
1309 This study used the UK Biobank resource under Application Numbers: 35148 and 60698.  
1310 Furthermore, we acknowledge the collaborative effort between the University of Southern  
1311 California, the University of Pennsylvania, and the University of Melbourne in conducting this  
1312 research. We gratefully acknowledge the support of the iSTAGING consortium, funded by the  
1313 National Institute on Aging through grant RF1 AG054409 at the University of Pennsylvania  
1314 (CD). We also acknowledge the funding provided by the National Institute of Biomedical  
1315 Imaging and Bioengineering at the University of Southern California through grant  
1316 5P41EB015922-25 (AT). Additionally, we acknowledge the funding program from the Rebecca  
1317 L. Cooper Foundation at the University of Melbourne (AZ). Lastly, WJ would like to thank  
1318 Paraskevi Parnpi and Jessica Incmikoski for their valuable administrative support during his  
1319 postdoctoral research at AIBIL. We thank Dr. Joris Deelen and Dr. Joanne M. Murabito for their  
1320 generosity in providing the GWAS summary statistics from their research<sup>49</sup> during the revision  
1321 process. Finally, we thank Caroline O'Driscoll and Ragini Jain for their contribution to  
1322 developing the MEDICINE knowledge portal.
